# Supplementary material for: Delineating significant genome-wide associations of variants with antipsychotic and antidepressant treatment response: implications for clinical pharmacogenomics
Source: PubMed Central journal article supplement (PMC6964087; doi:10.1186/s40246-019-0254-y), 2020-01-15
Supplement: 40246_2019_254_MOESM2_ESM.pdf [file 40246_2019_254_MOESM2_ESM.pdf]

**Supplementary information**

**Delineating significant genome-wide associations of variants with antipsychotic and antidepressant treatment response: Implications for clinical pharmacogenomics**

**Maria Koromina <sup>1</sup>, Stefania Koutsilieri <sup>1</sup>, George P. Patrinos <sup>1,2,3</sup>**

<sup>1</sup> Department of Pharmacy, School of Health Sciences, University of Patras, Patras, Greece;

<sup>2</sup> Department of Pathology, College of Medicine and Health Sciences, United Arab Emirates University, Al-Ain, United Arab Emirates;

<sup>3</sup> Zayed Center of Health Sciences, United Arab Emirates University, Al-Ain, United Arab Emirates

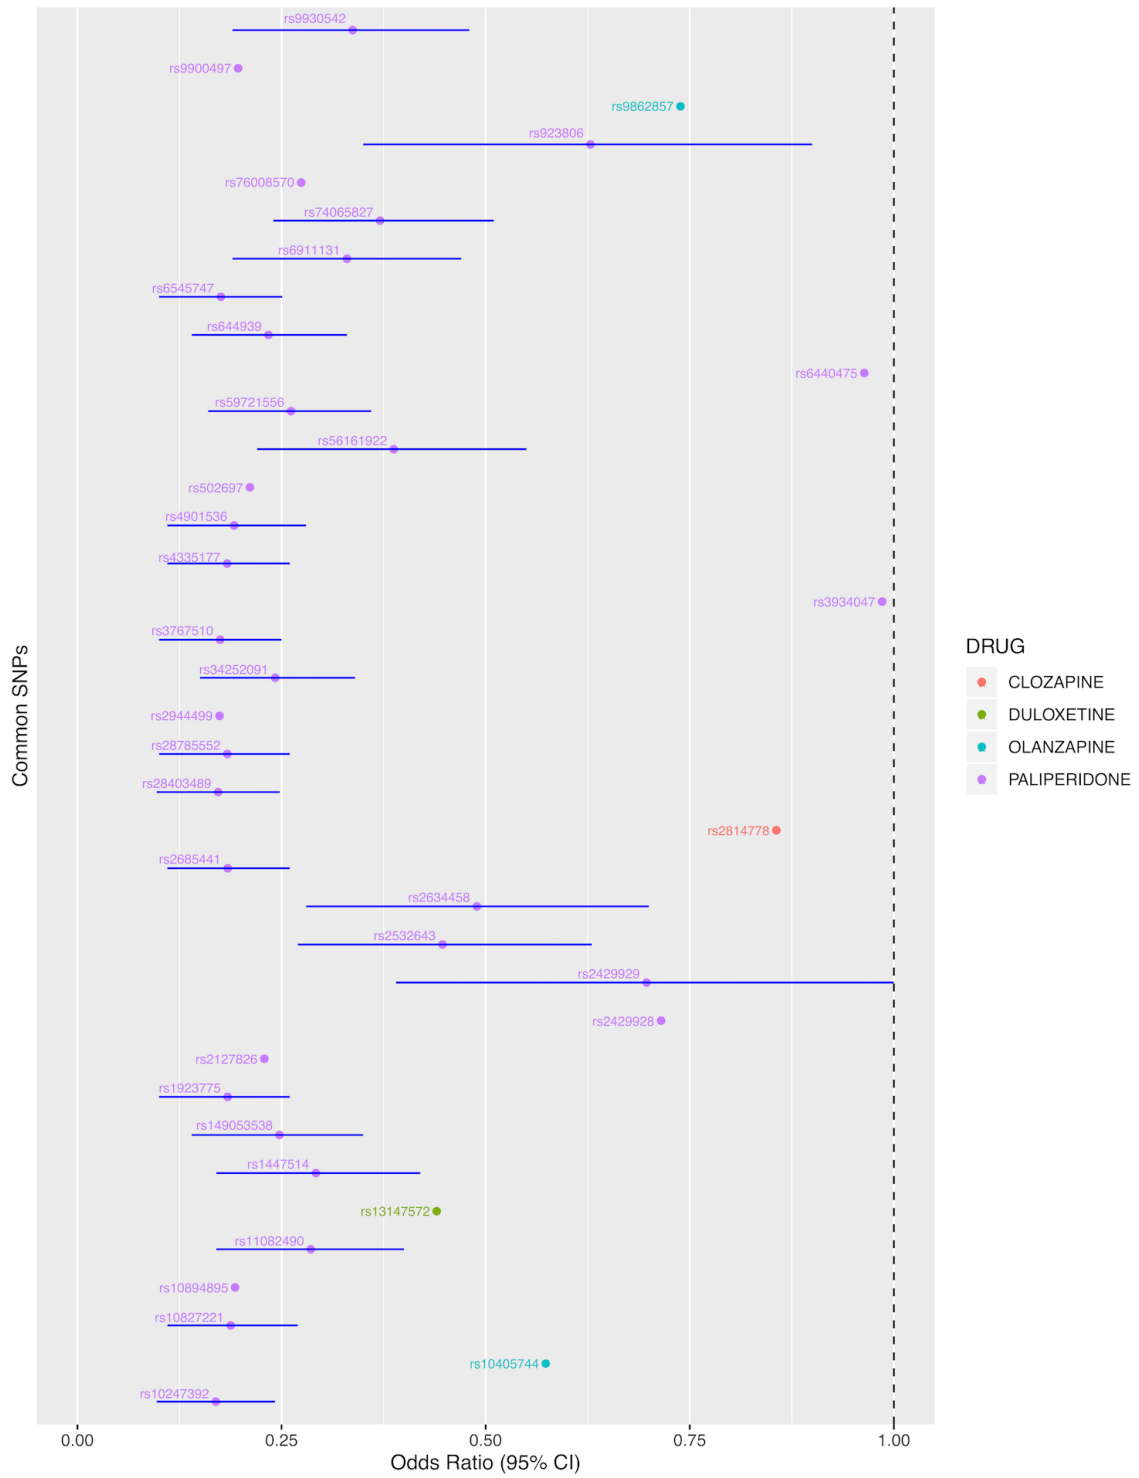

**Figure S1.** Odds ratio values (between 0-1) of pharmacogenomics (PGx) variants of common frequency (MAF > 0.10) are plotted alongside with the 95% of their confidence intervals. The PGx variants are colored based on the antipsychotic or antidepressant drug of the association.

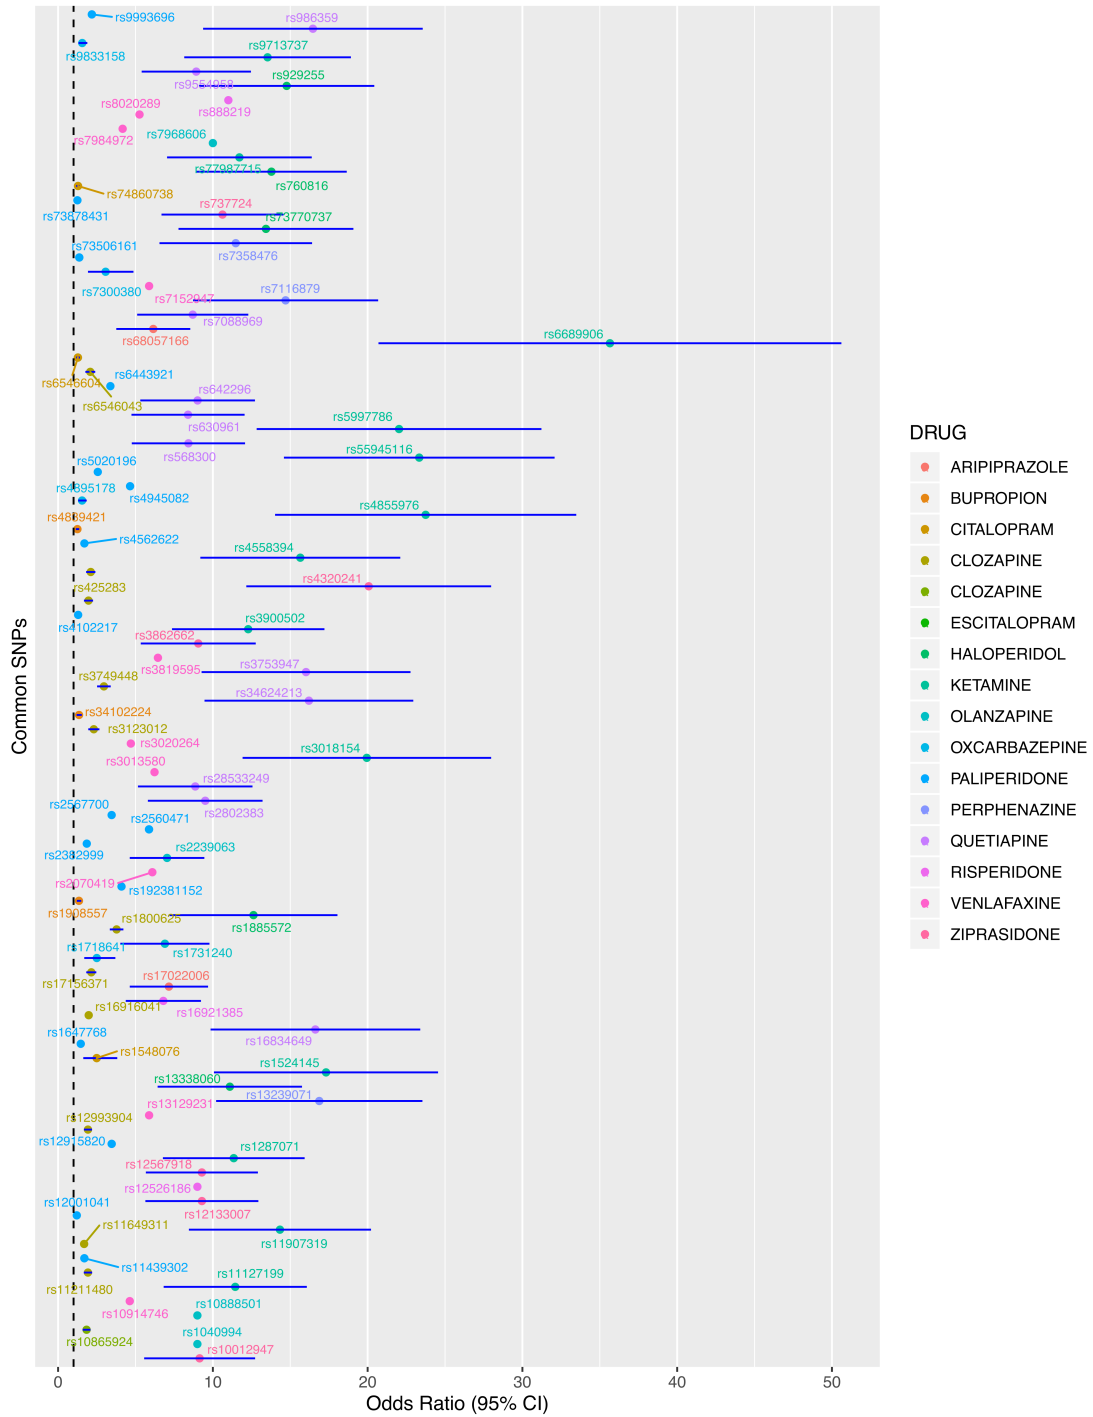

**Figure S2.** Odds ratio values (between 1-60) of pharmacogenomics (PGx) variants of common frequency (MAF > 0.10) are plotted alongside with the 95% of their confidence intervals. The PGx variants are colored based on the antipsychotic or antidepressant drug of the association.

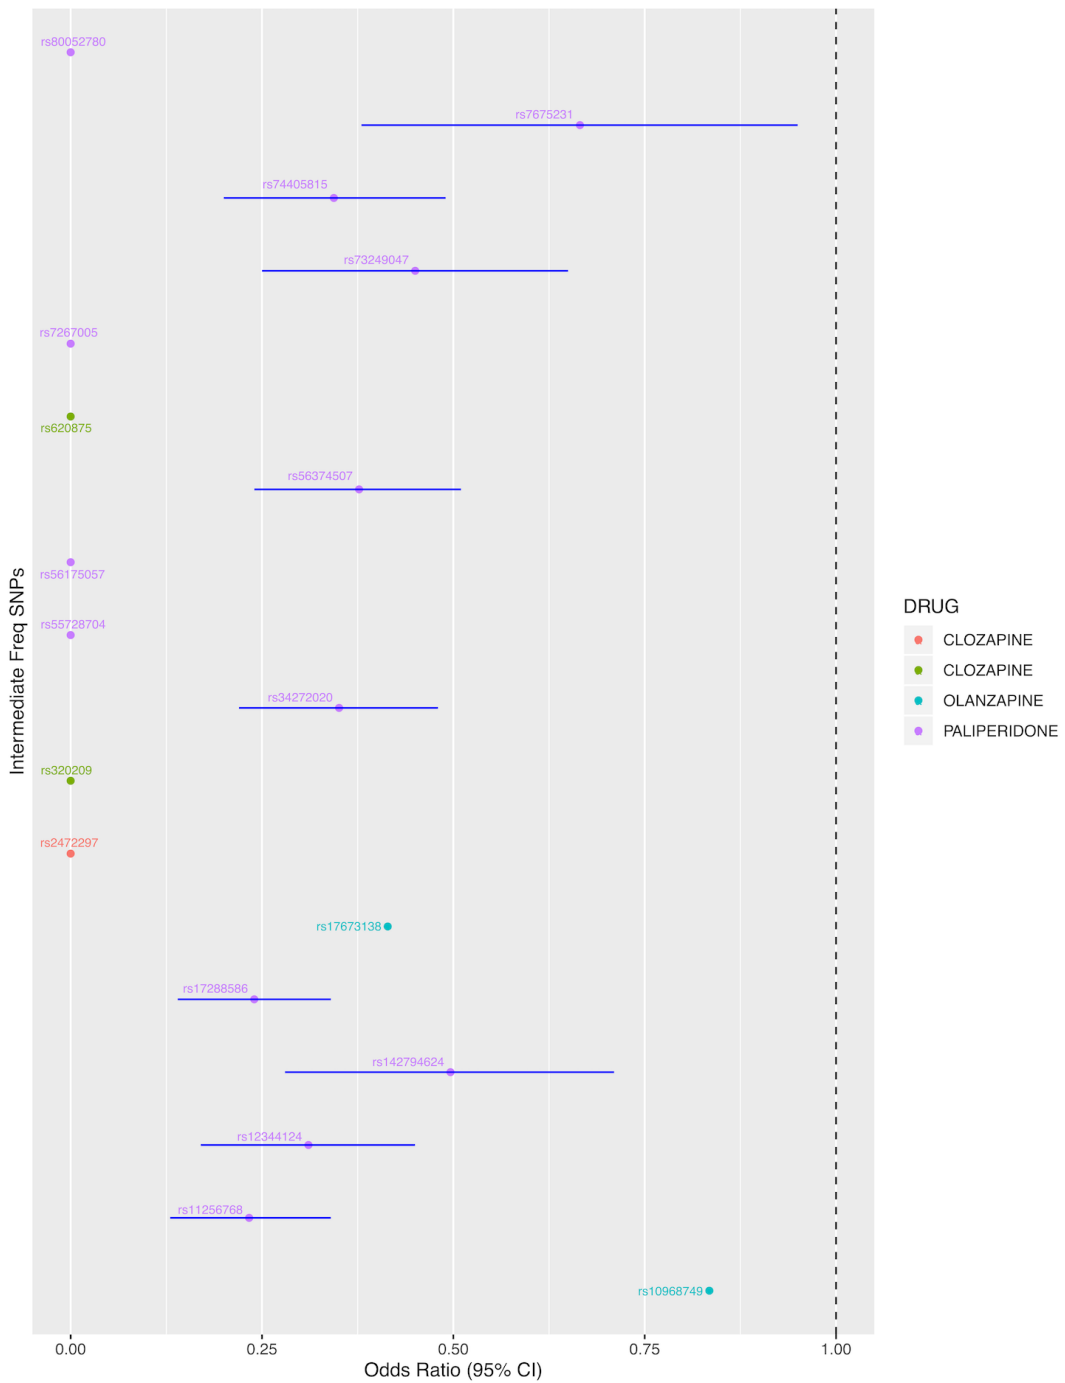

**Figure S3.** Odds ratio values (between 0-1) of pharmacogenomics (PGx) variants of intermediate frequency ( $0.05 < \text{MAF} < 0.10$ ) are plotted alongside with the 95% of their confidence intervals. The PGx variants are colored based on the antipsychotic or antidepressant drug of the association. Abbreviations: Intermediate Freq, intermediate frequency.

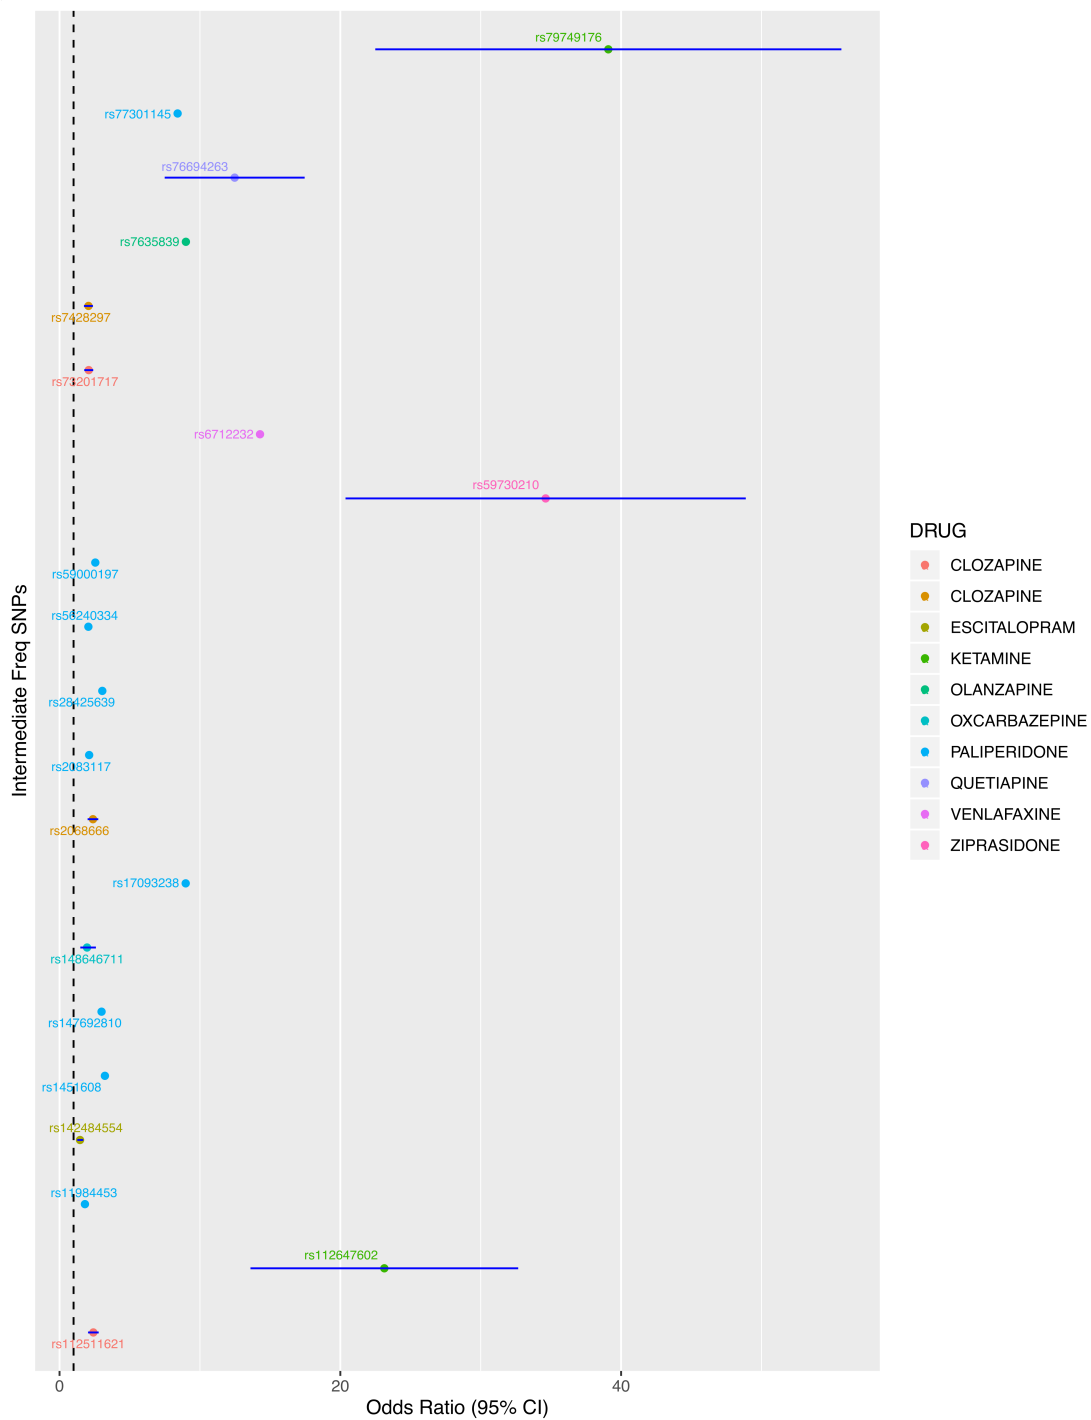

**Figure S4.** Odds ratio values (between 1-60) of pharmacogenomics (PGx) variants of intermediate frequency ( $0.05 < \text{MAF} < 0.10$ ) are plotted alongside with the 95% of their confidence intervals. The PGx variants are colored based on the antipsychotic or antidepressant drug of the association. Abbreviations: Intermediate Freq, intermediate frequency.

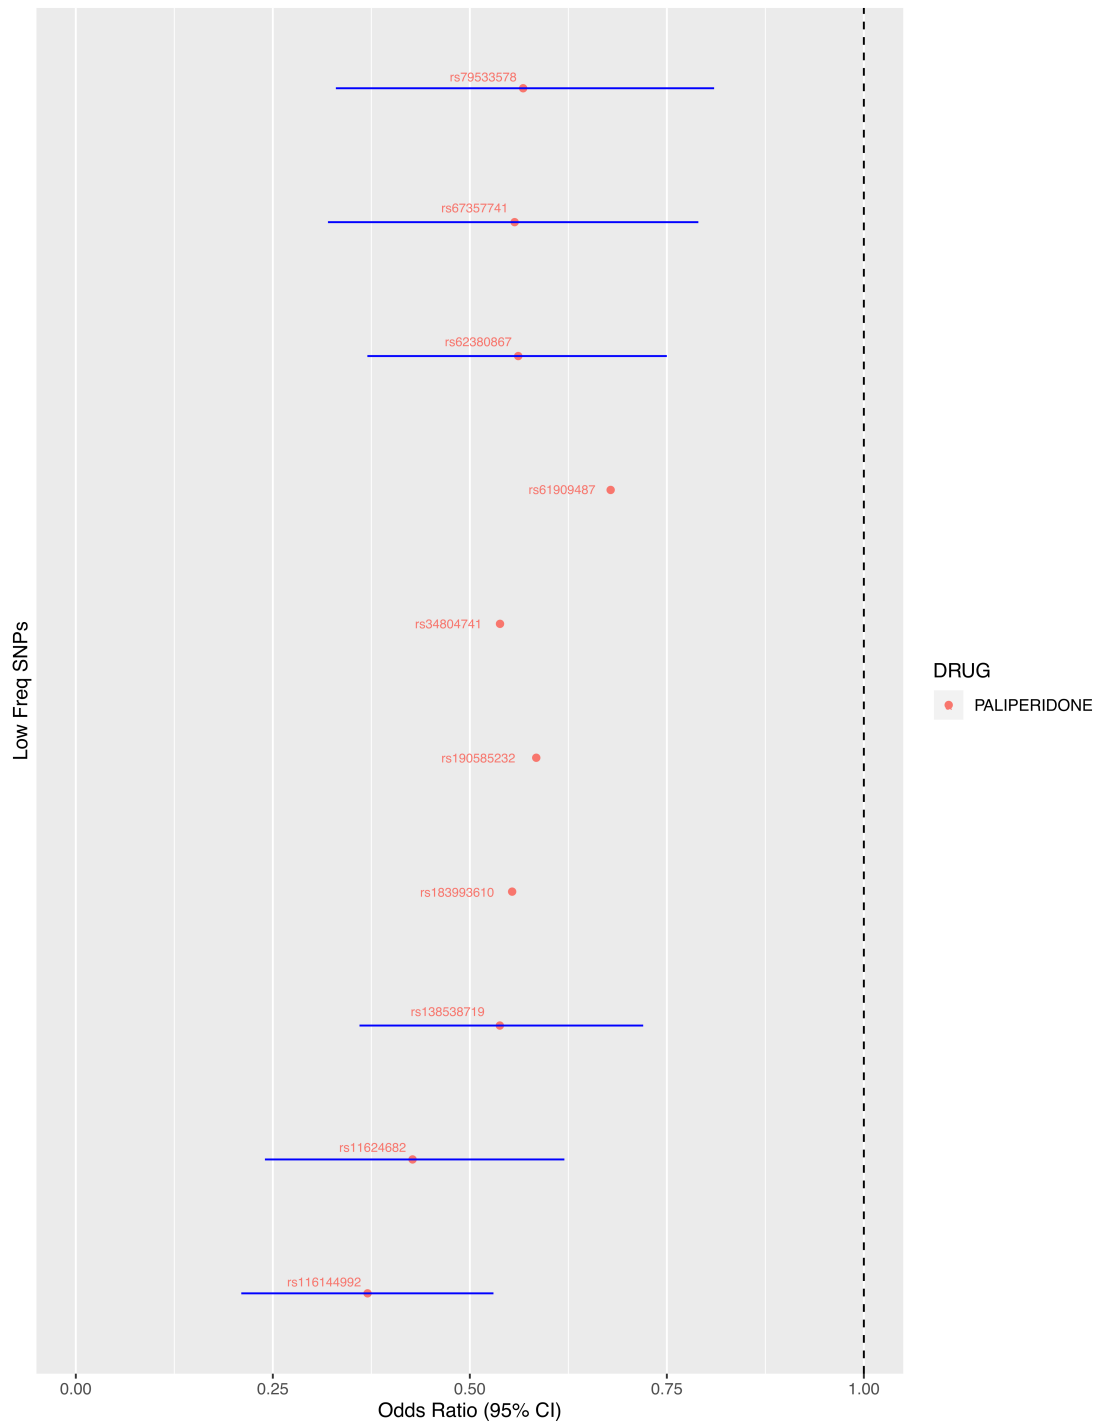

**Figure S5.** Odds ratio values (between 0-1) of pharmacogenomics (PGx) variants of low frequency ( $0.05 < \text{MAF} < 0.10$ ) are plotted alongside with the 95% of their confidence intervals. The PGx variants are colored based on the antipsychotic or antidepressant drug of the association. Abbreviations: Low Freq, low frequency.

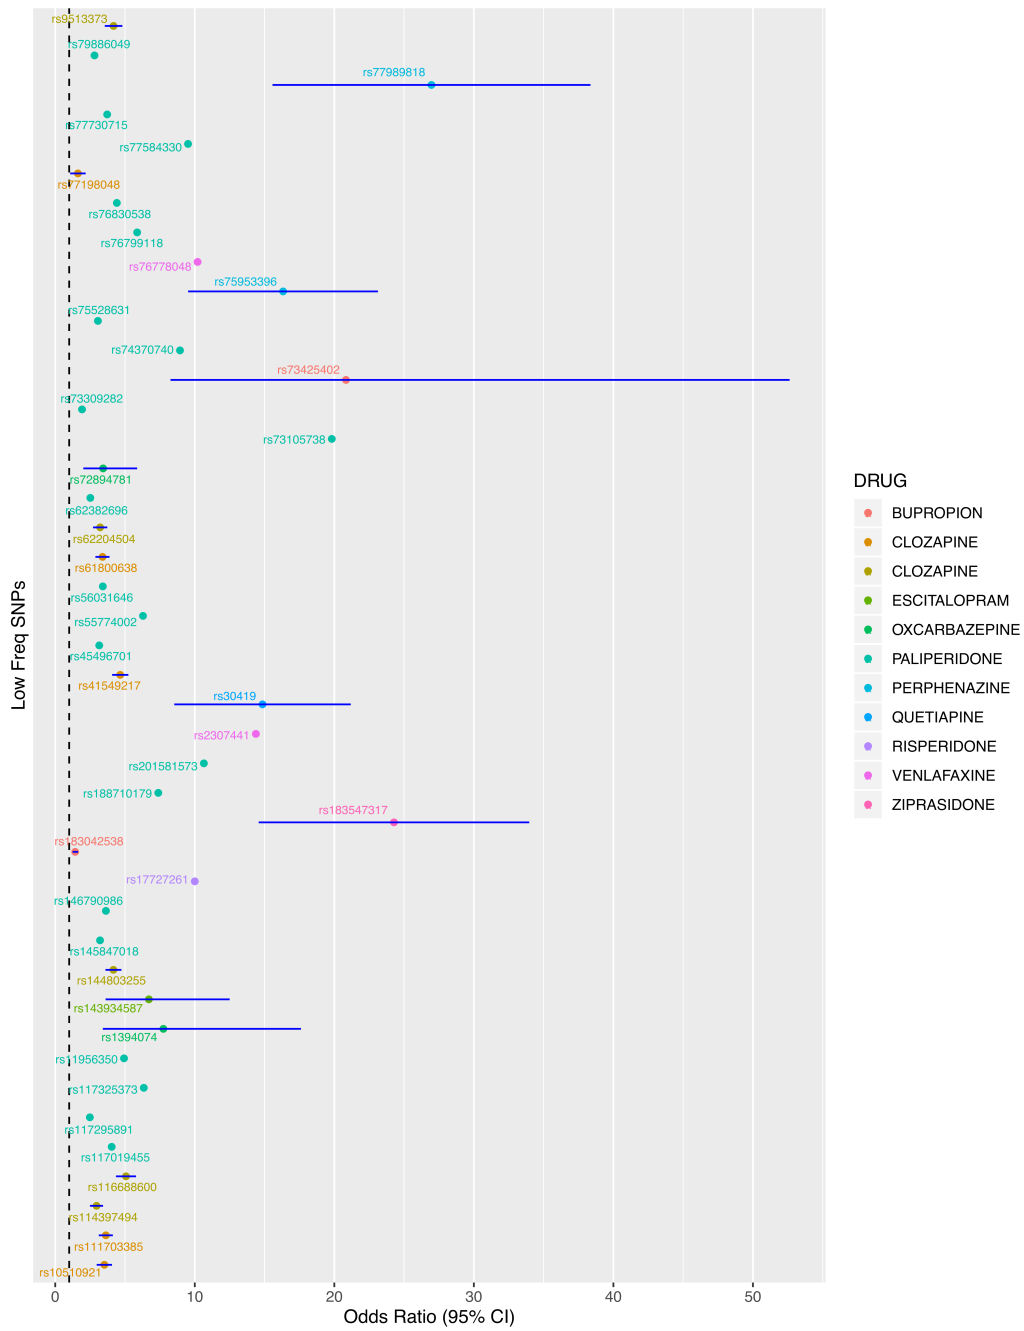

**Figure S6.** Odds ratio values (between 1-60) of pharmacogenomics (PGx) variants of low frequency ( $0.05 < \text{MAF} < 0.10$ ) are plotted alongside with the 95% of their confidence intervals. The PGx variants are colored based on the antipsychotic or antidepressant drug of the association. Abbreviations: Low Freq, low frequency.

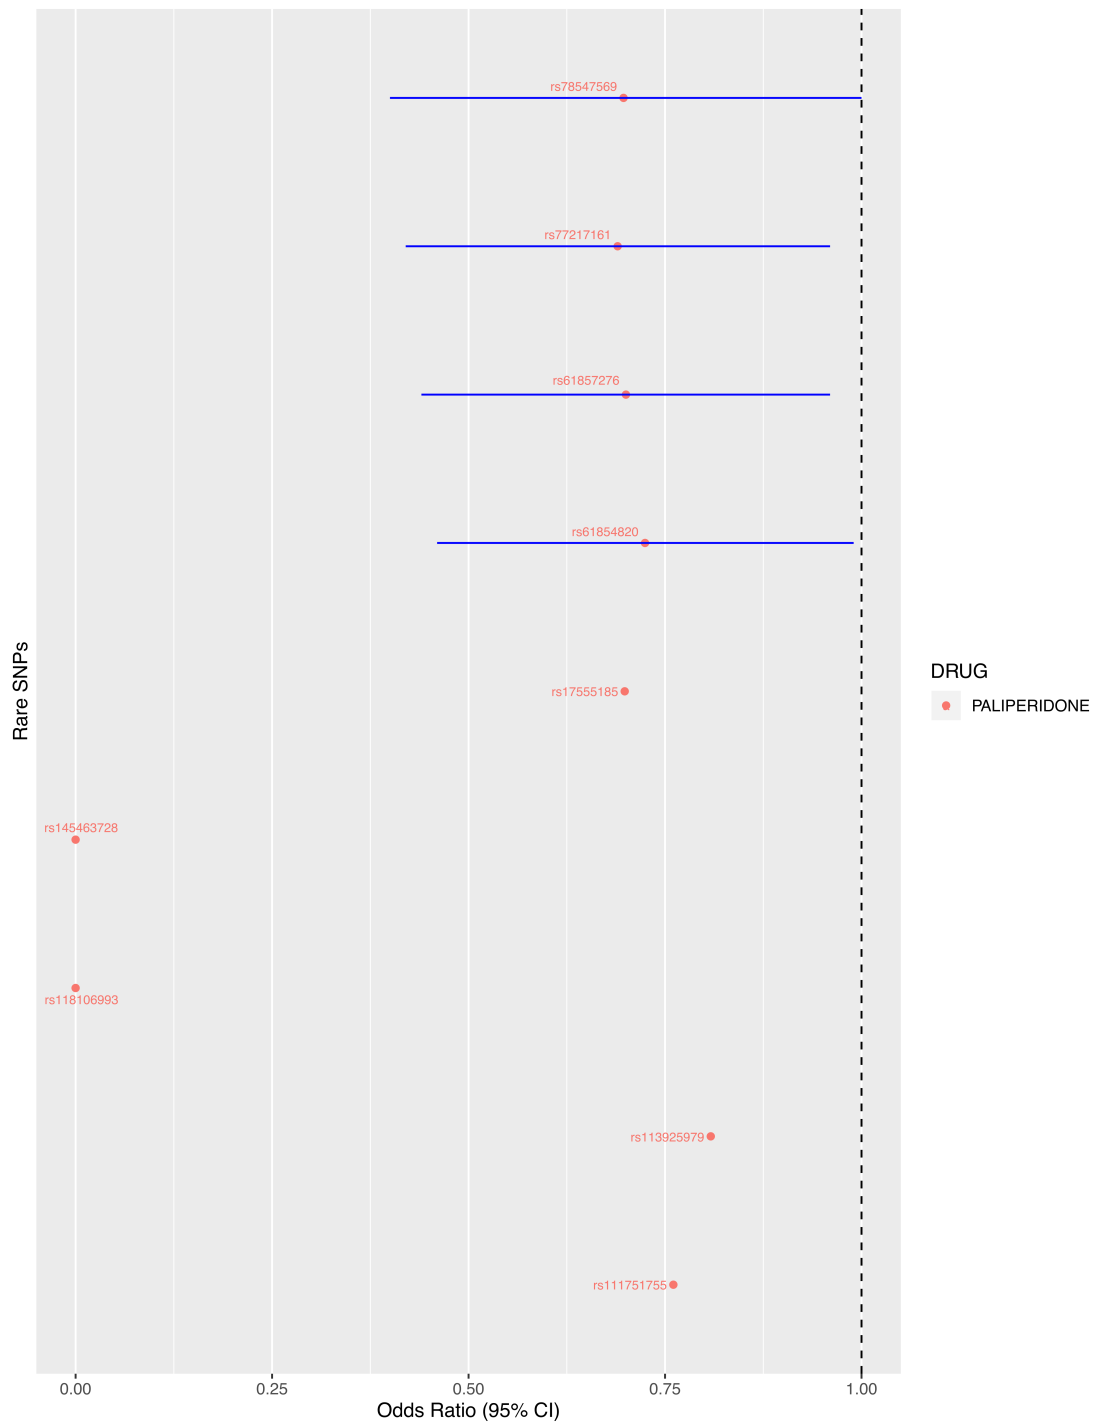

**Figure S7.** Odds ratio values (between 0-1) of pharmacogenomics (PGx) variants of rare frequency ( $0.05 < \text{MAF} < 0.10$ ) are plotted alongside with the 95% of their confidence intervals. The PGx variants are colored based on the antipsychotic or antidepressant drug of the association.



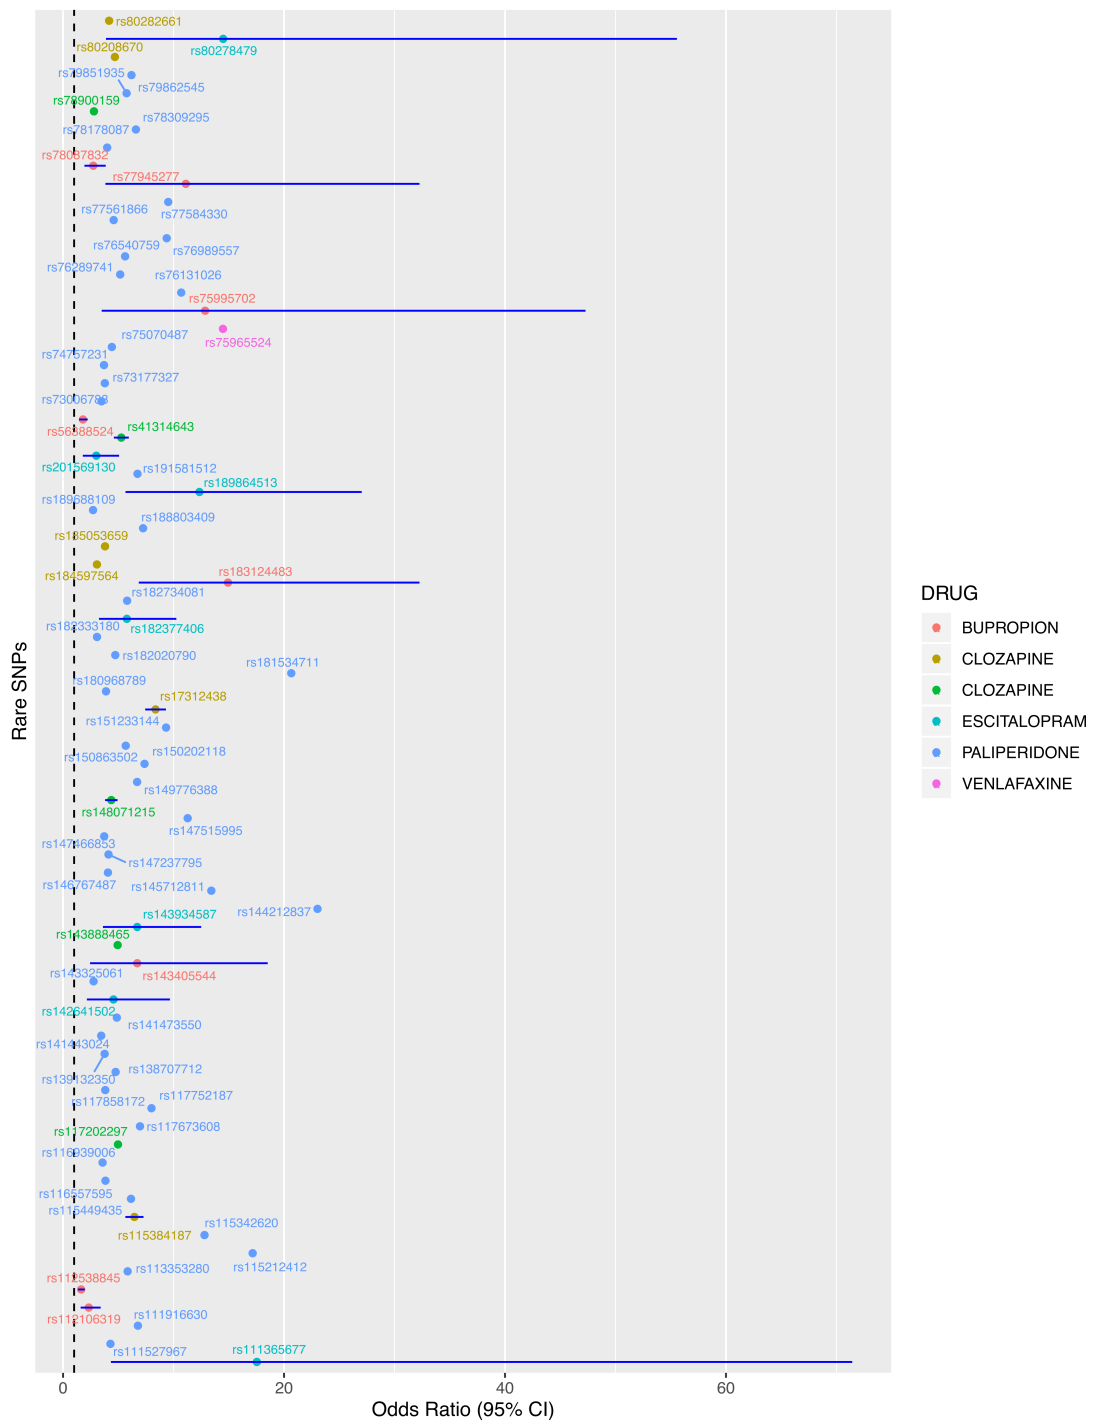

**Figure S8.** Odds ratio values (between 1-60) of pharmacogenomics (PGx) variants of rare frequency ( $0.05 < \text{MAF} < 0.10$ ) are plotted alongside with the 95% of their confidence intervals. The PGx variants are colored based on the antipsychotic or antidepressant drug of the association.

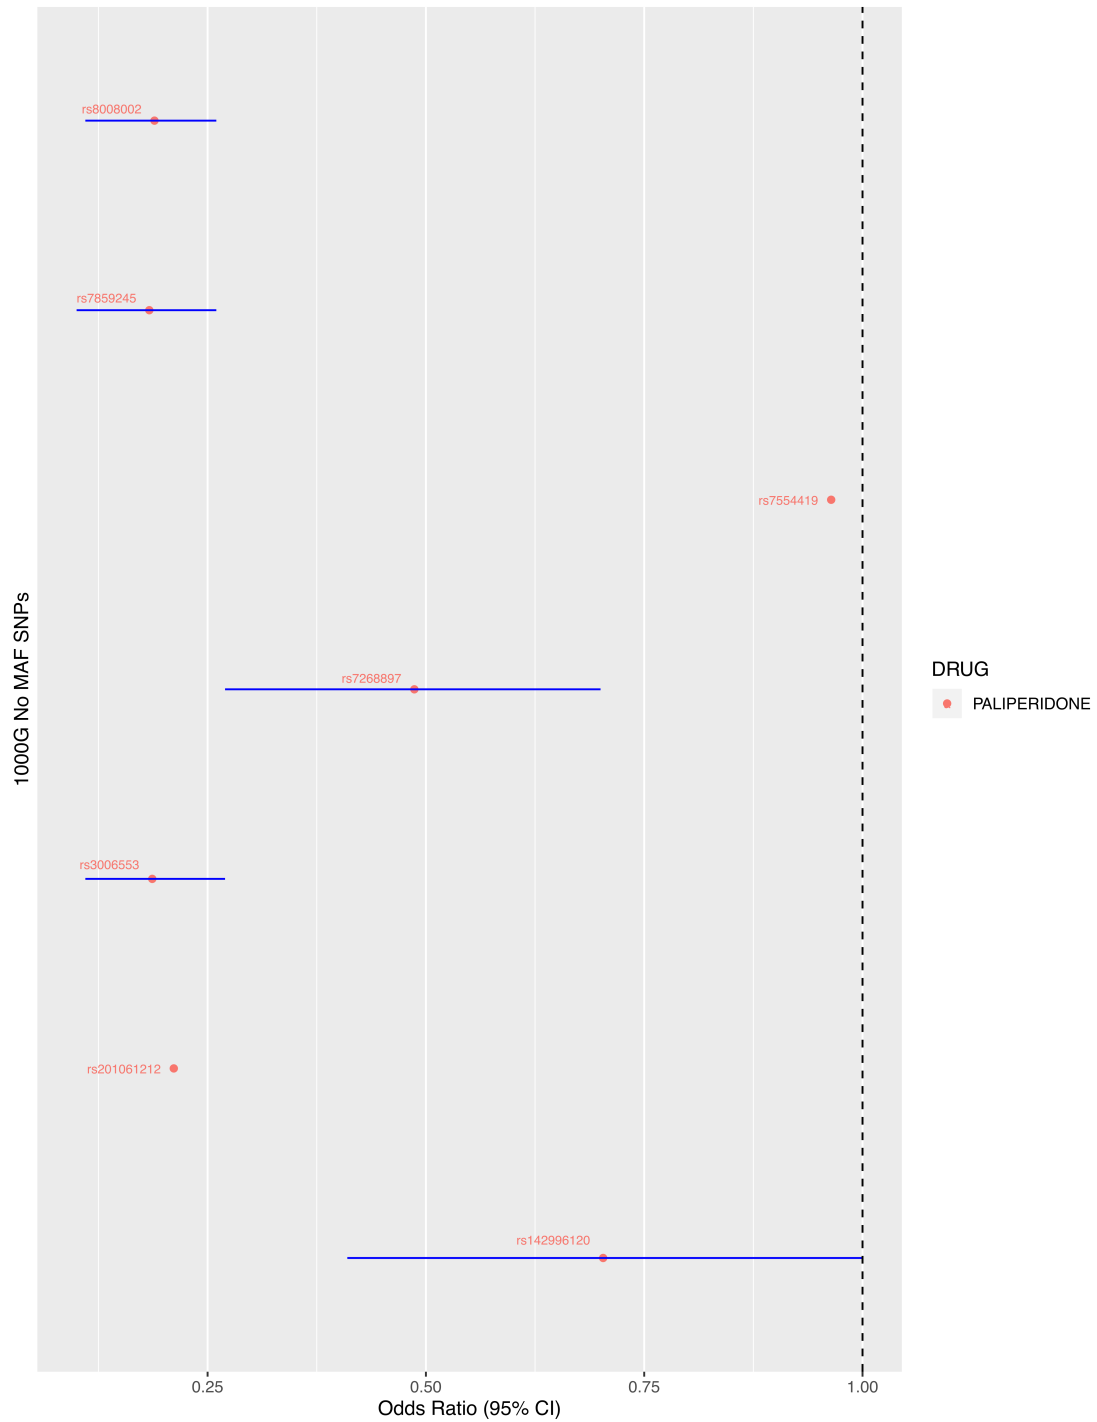

**Figure S9.** Odds ratio values (between 0-1) of pharmacogenomics (PGx) variants, which were not found in 1000Genomes Project, are plotted alongside with the 95% of their confidence intervals. The PGx variants are colored based on the antipsychotic or antidepressant drug of the association. Abbreviations: 1000G No MAF, not found in 1000Genomes Project (no MAF was found).

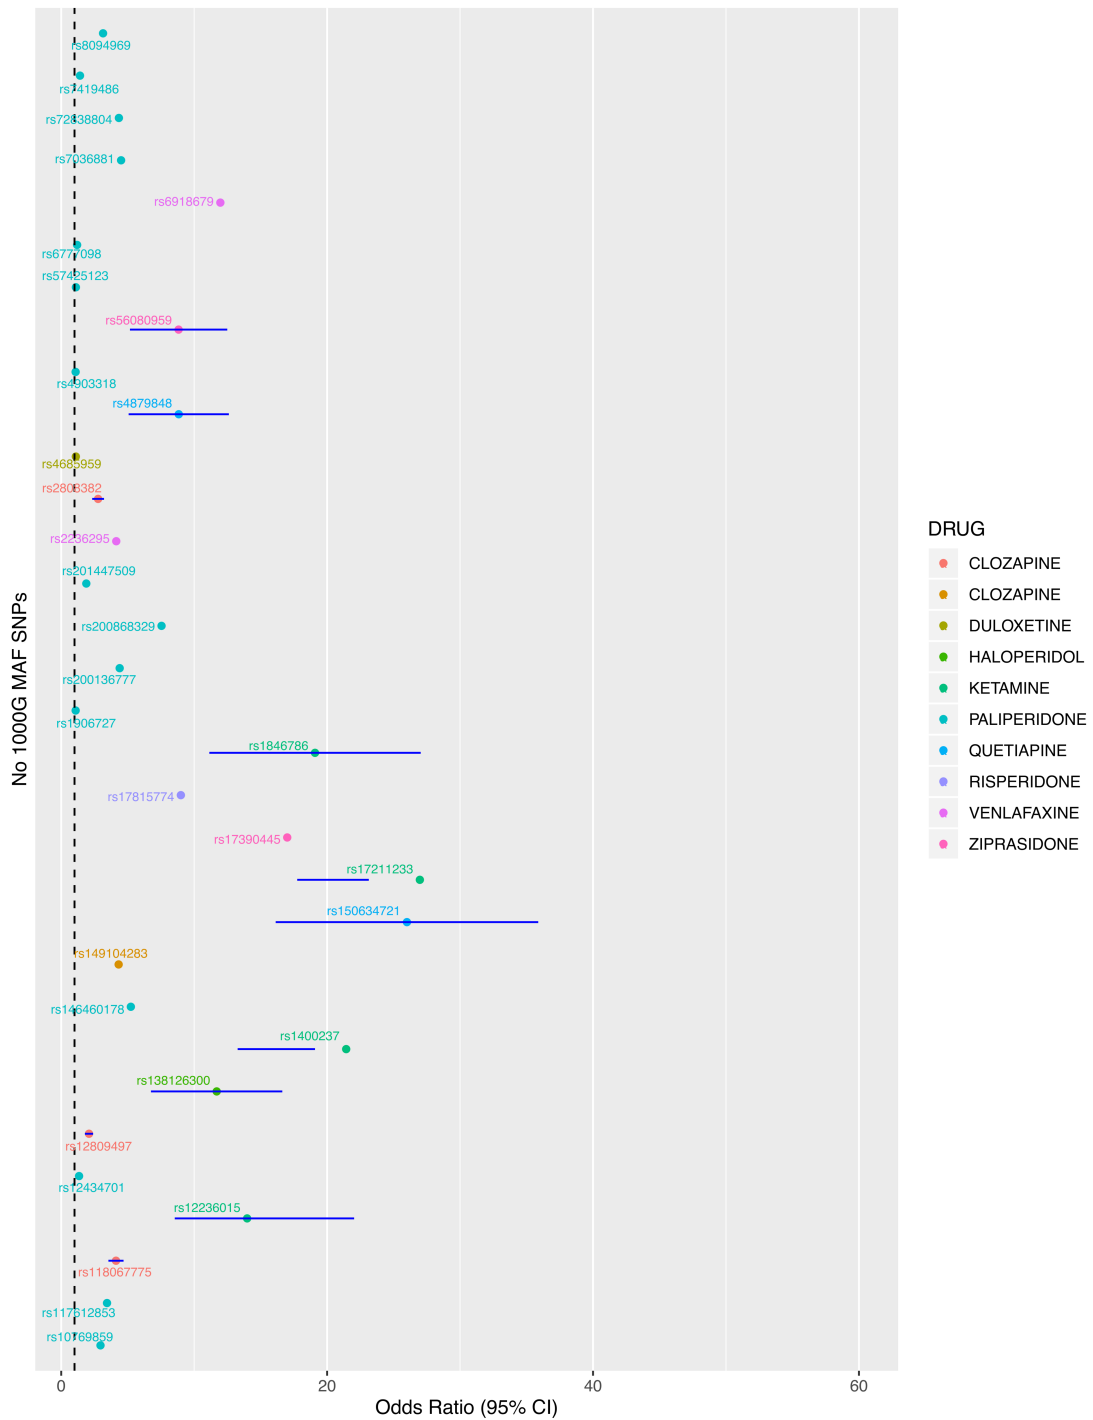

**Figure S10.** Odds ratio values (between 1-60) of pharmacogenomics (PGx) variants, which were not found in 1000Genomes Project, are plotted alongside with the 95% of their confidence intervals. The PGx variants are colored based on the antipsychotic or antidepressant drug of the association. Abbreviations: 1000G No MAF, not found in 1000Genomes Project (no MAF was found).
