# Supplementary material for: Delineating significant genome-wide associations of variants with antipsychotic and antidepressant treatment response: implications for clinical pharmacogenomics
Source: Hum Genomics. 2020 Jan 15;14:4. doi: 10.1186/s40246-019-0254-y (PMC6964087; doi:10.1186/s40246-019-0254-y)
Supplement: Supplementary file 1 — Additional file 1: Table S1. Summary information for the identified drug SNP-correlations. Table S2. List of the antipsychotic/antidepressant drug-SNP correlations that have been reported once (duplicates removed) in the assessed 20 studies deposited in the GWAS catalog. [file 40246_2019_254_MOESM1_ESM.xlsx]

## Sheet: Additional_Table_1
DRUG	MAPPED_GENE	SNP	STUDY (N=1, unless shown)	TYPE OF STUDY	REPLICATION	1000G MAF
ARIPIPRAZOLE	CNTN4	rs17022006	www.ncbi.nlm.nih.gov/pubmed/29503163	GWAS (CAPC)	n/a	0.3452
ARIPIPRAZOLE	TENM2	rs68057166	www.ncbi.nlm.nih.gov/pubmed/29503163	GWAS (CAPC)	n/a	0.3411
CLOZAPINE	MDFIC	rs2709505	www.ncbi.nlm.nih.gov/pubmed/25656473	cell GWAS	n/a	0.1076
CLOZAPINE	AL358942.1 - AL360085.1	rs10457252	www.ncbi.nlm.nih.gov/pubmed/25656473	cell GWAS	n/a	0.1895
CLOZAPINE	LEKR1	rs17382119	www.ncbi.nlm.nih.gov/pubmed/25656473	cell GWAS	n/a	0.0244
CLOZAPINE	AC044784.1 - LINC00709	rs1149933	www.ncbi.nlm.nih.gov/pubmed/25656473	cell GWAS	n/a	0.2236
CLOZAPINE	AC011193.1 - C17orf102	rs17662217	www.ncbi.nlm.nih.gov/pubmed/25656473	cell GWAS	n/a	0.2602
CLOZAPINE	WWOX	rs11642282	www.ncbi.nlm.nih.gov/pubmed/25656473	cell GWAS	n/a	-
CLOZAPINE	CHST15 - OAT	rs11818084	www.ncbi.nlm.nih.gov/pubmed/25656473	cell GWAS	n/a	0.1963
CLOZAPINE	NSMAF - TOX	rs1387221	www.ncbi.nlm.nih.gov/pubmed/25656473	cell GWAS	n/a	0.63
CLOZAPINE	SHANK1	rs12460584	www.ncbi.nlm.nih.gov/pubmed/25656473	cell GWAS	n/a	0.3301
CLOZAPINE	C7 - MROH2B	rs7732104	www.ncbi.nlm.nih.gov/pubmed/25656473	cell GWAS	n/a	0.1729
CLOZAPINE	TMCC3 - KRT19P2	rs7968270	www.ncbi.nlm.nih.gov/pubmed/25656473	cell GWAS	n/a	0.2512
CLOZAPINE	B4GALT4	rs6438504	www.ncbi.nlm.nih.gov/pubmed/25656473	cell GWAS	n/a	-
CLOZAPINE	LINC02151 - AP000770.2	rs17492380	www.ncbi.nlm.nih.gov/pubmed/25656473	cell GWAS	n/a	0.0325
CLOZAPINE	HMCN1 - PRG4	rs1293970	www.ncbi.nlm.nih.gov/pubmed/25656473	cell GWAS	3x(same study&compound)	0.7356
CLOZAPINE	HMCN1 - PRG4	rs1293970	www.ncbi.nlm.nih.gov/pubmed/25656473	cell GWAS	3x(same study&compound)	0.7356
CLOZAPINE	HMCN1 - PRG4	rs1293970	www.ncbi.nlm.nih.gov/pubmed/25656473	cell GWAS	3x(same study&compound)	0.7356
CLOZAPINE	CTNNA2	rs399885	www.ncbi.nlm.nih.gov/pubmed/20195266	GWAS (CATIE)	n/a	0.4008
CLOZAPINE	CTNNA2	rs7570469	www.ncbi.nlm.nih.gov/pubmed/20195266	GWAS (CATIE)	n/a	0.5032
CLOZAPINE	ST6GALNAC2P1 - FUNDC2P2	rs1534238	www.ncbi.nlm.nih.gov/pubmed/20195266	GWAS (CATIE)	n/a	0.5623
CLOZAPINE	RNU6-440P - AC069148.1	rs17385675	www.ncbi.nlm.nih.gov/pubmed/20195266	GWAS (CATIE)	n/a	0.0333
CLOZAPINE	PPARD	rs9658108	www.ncbi.nlm.nih.gov/pubmed/20195266	GWAS (CATIE)	n/a	0.0403
CLOZAPINE	AL450338.1 - RNU4-12P	rs1577917	www.ncbi.nlm.nih.gov/pubmed/20195266	GWAS (CATIE)	n/a	0.1813
CLOZAPINE	AC019117.1	rs10499504	www.ncbi.nlm.nih.gov/pubmed/20195266	GWAS (CATIE)	n/a	0.1368
CLOZAPINE	AC006387.1, PRKAR2B	rs13224682	www.ncbi.nlm.nih.gov/pubmed/20195266	GWAS (CATIE)	n/a	-
CLOZAPINE	ARL2BPP7 - RNU6-329P	rs320209	www.ncbi.nlm.nih.gov/pubmed/20195266	GWAS (CATIE)	n/a	0.0753
CLOZAPINE	SLC39A12 - CACNB2	rs17661538	www.ncbi.nlm.nih.gov/pubmed/20195266	GWAS (CATIE)	n/a	0.1322
CLOZAPINE	ZNF438 - LINC02664	rs2994684	www.ncbi.nlm.nih.gov/pubmed/20195266	GWAS (CATIE)	n/a	0.8233
CLOZAPINE	KIRREL3	rs620875	www.ncbi.nlm.nih.gov/pubmed/20195266	GWAS (CATIE)	n/a	0.0667
CLOZAPINE	CDH13	rs17216786	www.ncbi.nlm.nih.gov/pubmed/20195266	GWAS (CATIE)	n/a	0.0345
CLOZAPINE	MYT1 - PCMTD2	rs6011368	www.ncbi.nlm.nih.gov/pubmed/25656473	cell GWAS	n/a	0.5403
CLOZAPINE	DLGAP2	rs17739794	www.ncbi.nlm.nih.gov/pubmed/25656473	cell GWAS	n/a	0.4415
CLOZAPINE	UGT1A9, UGT1A10, UGT1A5, UGT1A8, UGT1A4, UGT1A7, UGT1A6	rs2011425	www.ncbi.nlm.nih.gov/pubmed/30922102	GWAS & cell assay data	n/a	-
CLOZAPINE	AC021146.8 - UGT2B10	rs11725502	www.ncbi.nlm.nih.gov/pubmed/30922102	GWAS & cell assay data	n/a	0.0439
CLOZAPINE	CYP1A1 - CYP1A2	rs2472297	www.ncbi.nlm.nih.gov/pubmed/30922102	GWAS & cell assay data	n/a	0.0657
CLOZAPINE	AC093720.1 - AC021146.8	rs10023464	www.ncbi.nlm.nih.gov/pubmed/30922102	GWAS & cell assay data	n/a	0.1909
CLOZAPINE	CYP2C19, AL583836.1	rs12767583	www.ncbi.nlm.nih.gov/pubmed/30922102	GWAS & cell assay data	n/a	0.2212
CLOZAPINE	AC111000.6 - AC111000.1	rs7668556	www.ncbi.nlm.nih.gov/pubmed/30922102	GWAS & cell assay data	n/a	0.7177
CLOZAPINE	HLA-B, HLA-B, HLA-B, HLA-B, HLA-B, HLA-B	rs41549217	www.ncbi.nlm.nih.gov/pubmed/25187353	GWAS (CIAG)	n/a	0.0367
CLOZAPINE	AL355095.1 - AL359238.1	rs148071215	www.ncbi.nlm.nih.gov/pubmed/25187353	GWAS (CIAG)	n/a	0.0056
CLOZAPINE	RN7SL178P - CLDN23	rs111703385	www.ncbi.nlm.nih.gov/pubmed/25187353	GWAS (CIAG)	n/a	0.019
CLOZAPINE	SILC1	rs12993904	www.ncbi.nlm.nih.gov/pubmed/25187353	GWAS (CIAG)	n/a	0.3281
CLOZAPINE	TEX9	rs144803255	www.ncbi.nlm.nih.gov/pubmed/25187353	GWAS (CIAG)	n/a	0.0218
CLOZAPINE	RAD23A	rs45495792	www.ncbi.nlm.nih.gov/pubmed/25187353	GWAS (CIAG)	n/a	0.1202
CLOZAPINE	KANSL2	rs118067775	www.ncbi.nlm.nih.gov/pubmed/25187353	GWAS (CIAG)	n/a	-
CLOZAPINE	NMNAT2	rs41314643	www.ncbi.nlm.nih.gov/pubmed/25187353	GWAS (CIAG)	n/a	0.005
CLOZAPINE	TAL1, AL135960.1	rs11211480	www.ncbi.nlm.nih.gov/pubmed/25187353	GWAS (CIAG)	n/a	0.2808
CLOZAPINE	COL24A1 - AL136382.1	rs61800638	www.ncbi.nlm.nih.gov/pubmed/25187353	GWAS (CIAG)	n/a	0.025
CLOZAPINE	AC099329.2, ACKR2, KRBOX1, AC092042.3	rs10865924	www.ncbi.nlm.nih.gov/pubmed/25187353	GWAS (CIAG)	n/a	0.3177
CLOZAPINE	LINC00507 - LINC02441	rs12809497	www.ncbi.nlm.nih.gov/pubmed/25187353	GWAS (CIAG)	n/a	-
CLOZAPINE	AL590365.1	rs17156371	www.ncbi.nlm.nih.gov/pubmed/25187353	GWAS (CIAG)	n/a	0.1088
CLOZAPINE	XRCC4	rs114397494	www.ncbi.nlm.nih.gov/pubmed/25187353	GWAS (CIAG)	n/a	0.0403
CLOZAPINE	LINC01707	rs3123012	www.ncbi.nlm.nih.gov/pubmed/25187353	GWAS (CIAG)	n/a	0.244
CLOZAPINE	TMTC3 - RF00019	rs112511621	www.ncbi.nlm.nih.gov/pubmed/25187353	GWAS (CIAG)	n/a	0.0857
CLOZAPINE	JPH2	rs62204504	www.ncbi.nlm.nih.gov/pubmed/25187353	GWAS (CIAG)	n/a	0.0323
CLOZAPINE	VPS54	rs6546043	www.ncbi.nlm.nih.gov/pubmed/25187353	GWAS (CIAG)	n/a	0.6306
CLOZAPINE	ADAMTS9-AS2	rs10510921	www.ncbi.nlm.nih.gov/pubmed/25187353	GWAS (CIAG)	n/a	0.0475
CLOZAPINE	FARP1	rs9513373	www.ncbi.nlm.nih.gov/pubmed/25187353	GWAS (CIAG)	n/a	0.0132
CLOZAPINE	AC011586.2	rs73201717	www.ncbi.nlm.nih.gov/pubmed/25187353	GWAS (CIAG)	n/a	0.0691
CLOZAPINE	LPGAT1-AS1 - AC092814.1	rs2808382	www.ncbi.nlm.nih.gov/pubmed/25187353	GWAS (CIAG)	n/a	-
CLOZAPINE	LINC02016	rs7428297	www.ncbi.nlm.nih.gov/pubmed/25187353	GWAS (CIAG)	n/a	0.0601
CLOZAPINE	CHI3L1 - CHIT1	rs115384187	www.ncbi.nlm.nih.gov/pubmed/25187353	GWAS (CIAG)	n/a	0.0032
CLOZAPINE	LILRB4, LILRB4, LILRB4, LILRB4	rs425283	www.ncbi.nlm.nih.gov/pubmed/25187353	GWAS (CIAG)	n/a	0.1282
CLOZAPINE	AC113347.4	rs116688600	www.ncbi.nlm.nih.gov/pubmed/25187353	GWAS (CIAG)	n/a	0.015
CLOZAPINE	AC092013.1 - SOCS5P1	rs17312438	www.ncbi.nlm.nih.gov/pubmed/25187353	GWAS (CIAG)	n/a	0.0048
CLOZAPINE	NFASC	rs2068666	www.ncbi.nlm.nih.gov/pubmed/25187353	GWAS (CIAG)	n/a	0.0519
CLOZAPINE	ACKR1, CADM3-AS1	rs2814778	www.ncbi.nlm.nih.gov/pubmed/30647433	GWAS (CIAG)	n/a	0.2664
CLOZAPINE	ZNF618	rs77198048	www.ncbi.nlm.nih.gov/pubmed/30647433	GWAS (CIAG)	n/a	0.0325
CLOZAPINE	AC011604.2	rs149104283	www.ncbi.nlm.nih.gov/pubmed/27400856	GWAS (CIAG)	n/a	-
CLOZAPINE	RNU6-67P - SLITRK1	rs80208670	www.ncbi.nlm.nih.gov/pubmed/27400856	GWAS (CIAG)	n/a	0.0088
CLOZAPINE	ADGRL2	rs184597564	www.ncbi.nlm.nih.gov/pubmed/27400856	GWAS (CIAG)	n/a	0.0086
CLOZAPINE	GSAP	rs78900159	www.ncbi.nlm.nih.gov/pubmed/27400856	GWAS (CIAG)	n/a	0.0084
CLOZAPINE	LINC00845 - TMEM26	rs16916041	www.ncbi.nlm.nih.gov/pubmed/27400856	GWAS (CIAG)	n/a	0.1224
CLOZAPINE	RN7SL557P - AQP8	rs11649311	www.ncbi.nlm.nih.gov/pubmed/27400856	GWAS (CIAG)	n/a	0.4888
CLOZAPINE	AC105021.1 - TMEM100	rs117202297	www.ncbi.nlm.nih.gov/pubmed/27400856	GWAS (CIAG)	n/a	0.0024
CLOZAPINE	LINC02093 - HS3ST3A1	rs80282661	www.ncbi.nlm.nih.gov/pubmed/27400856	GWAS (CIAG)	n/a	0.0038
CLOZAPINE	AC097066.1 - LINC01748	rs185053659	www.ncbi.nlm.nih.gov/pubmed/27400856	GWAS (CIAG)	n/a	0.0056
CLOZAPINE	SCN8A	rs143888465	www.ncbi.nlm.nih.gov/pubmed/27400856	GWAS (CIAG)	n/a	0.0046
CLOZAPINE	GRM7	rs3749448	www.ncbi.nlm.nih.gov/pubmed/26876947	GWAS (CIAG)	n/a	0.2825
CLOZAPINE	AGER - AL662884.1	rs1800625	www.ncbi.nlm.nih.gov/pubmed/26876947	GWAS (CIAG)	n/a	0.1366
HALOPERIDOL	ARID5B - RTKN2	rs7912580	www.ncbi.nlm.nih.gov/pubmed/24751813	GWAS	n/a	0.0948
HALOPERIDOL	EIF2AK4	rs2412459	www.ncbi.nlm.nih.gov/pubmed/24751813	GWAS	n/a	0.8051
HALOPERIDOL	AJAP1 - BX005132.2	rs760816	www.ncbi.nlm.nih.gov/pubmed/29503163	GWAS (CAPC)	n/a	0.8299
HALOPERIDOL	NPVF - AC004129.3	rs929255	www.ncbi.nlm.nih.gov/pubmed/29503163	GWAS (CAPC)	n/a	0.5323
HALOPERIDOL	CNTNAP4	rs13338060	www.ncbi.nlm.nih.gov/pubmed/29503163	GWAS (CAPC)	n/a	0.3724
HALOPERIDOL	AC113167.1	rs73770737	www.ncbi.nlm.nih.gov/pubmed/29503163	GWAS (CAPC)	n/a	0.2037
HALOPERIDOL	ZNF665	rs138126300	www.ncbi.nlm.nih.gov/pubmed/29503163	GWAS (CAPC)	n/a	-
HALOPERIDOL	RF00019 - AL135938.1	rs1885572	www.ncbi.nlm.nih.gov/pubmed/29503163	GWAS (CAPC)	n/a	0.1432
ILOPERIDONE	NUBPL	rs7142881	www.ncbi.nlm.nih.gov/pubmed/18521091	GWAS	n/a	0.4692
ILOPERIDONE	CERKL	rs993648	www.ncbi.nlm.nih.gov/pubmed/18521091	GWAS	n/a	0.4253
ILOPERIDONE	SLCO3A1	rs3924426	www.ncbi.nlm.nih.gov/pubmed/18521091	GWAS	n/a	0.1196
ILOPERIDONE	CELF4	rs4799915	www.ncbi.nlm.nih.gov/pubmed/18521091	GWAS	n/a	0.5703
ILOPERIDONE	NRG3	rs4933824	www.ncbi.nlm.nih.gov/pubmed/18521091	GWAS	n/a	0.8756
ILOPERIDONE	PALLD	rs17054392	www.ncbi.nlm.nih.gov/pubmed/18521091	GWAS	n/a	0.0569
KETAMINE	SEC11A	rs55945116	www.ncbi.nlm.nih.gov/pubmed/30552317	GWAS	n/a	0.3512
KETAMINE	RPSAP44 - KRASP1	rs112647602	www.ncbi.nlm.nih.gov/pubmed/30552317	GWAS	n/a	0.0901
KETAMINE	AC093831.1 - AC025554.1	rs1846786	www.ncbi.nlm.nih.gov/pubmed/30552317	GWAS	n/a	-
KETAMINE	OSBP2	rs5997786	www.ncbi.nlm.nih.gov/pubmed/30552317	GWAS	n/a	0.2969
KETAMINE	MRPL50P1 - AC009414.1	rs1524145	www.ncbi.nlm.nih.gov/pubmed/30552317	GWAS	n/a	0.6376
KETAMINE	MAB21L3 - LINC01779	rs6689906	www.ncbi.nlm.nih.gov/pubmed/30552317	GWAS	n/a	0.1813
KETAMINE	AL357137.1 - LINC01649	rs79749176	www.ncbi.nlm.nih.gov/pubmed/30552317	GWAS	n/a	0.0543
KETAMINE	RASGRF2	rs17211233	www.ncbi.nlm.nih.gov/pubmed/30552317	GWAS	n/a	-
KETAMINE	ROBO2	rs1400237	www.ncbi.nlm.nih.gov/pubmed/30552317	GWAS	n/a	-
KETAMINE	AL441989.1 - MIR147A	rs12236015	www.ncbi.nlm.nih.gov/pubmed/30552317	GWAS	n/a	-
KETAMINE	ROBO2	rs9713737	www.ncbi.nlm.nih.gov/pubmed/30552317	GWAS	n/a	0.5519
KETAMINE	AC007389.1	rs77987715	www.ncbi.nlm.nih.gov/pubmed/30552317	GWAS	n/a	0.3227
KETAMINE	AC093909.4 - AC122138.1	rs3900502	www.ncbi.nlm.nih.gov/pubmed/30552317	GWAS	n/a	0.5937
KETAMINE	AP000943.3	rs3018154	www.ncbi.nlm.nih.gov/pubmed/30552317	GWAS	n/a	0.369
KETAMINE	SHLD1	rs1287071	www.ncbi.nlm.nih.gov/pubmed/30552317	GWAS	n/a	0.4706
KETAMINE	TOGARAM2	rs11127199	www.ncbi.nlm.nih.gov/pubmed/30552317	GWAS	n/a	0.4832
KETAMINE	ROBO2	rs4855976	www.ncbi.nlm.nih.gov/pubmed/30552317	GWAS	n/a	0.8357
KETAMINE	GDAP1L1 - FITM2	rs11907319	www.ncbi.nlm.nih.gov/pubmed/30552317	GWAS	n/a	0.3948
KETAMINE	LINC00923	rs4558394	www.ncbi.nlm.nih.gov/pubmed/30552317	GWAS	n/a	0.4171
OLANZAPINE	ADGRV1	rs1967256	www.ncbi.nlm.nih.gov/pubmed/20195266	GWAS (CATIE)	n/a	0.2023
OLANZAPINE	ZFPM2	rs977396	www.ncbi.nlm.nih.gov/pubmed/20195266	GWAS (CATIE)	n/a	0.8924
OLANZAPINE	AC009117.2	rs4783227	www.ncbi.nlm.nih.gov/pubmed/20195266	GWAS (CATIE)	n/a	-
OLANZAPINE	IGSF8 - ATP1A2	rs6688363	www.ncbi.nlm.nih.gov/pubmed/23241943	GWAS	n/a	0.2113
OLANZAPINE	SPOPL	rs10170310	www.ncbi.nlm.nih.gov/pubmed/23241943	GWAS	n/a	-
OLANZAPINE	HIVEP1 - EDN1	rs1040994	www.ncbi.nlm.nih.gov/pubmed/19721433	GWAS	n/a	0.1064
OLANZAPINE	CRCT1 - LCE3E	rs10888501	www.ncbi.nlm.nih.gov/pubmed/19721433	GWAS	n/a	0.5519
OLANZAPINE	RF00019 - AC026320.2	rs7635839	www.ncbi.nlm.nih.gov/pubmed/19721433	GWAS	n/a	0.0721
OLANZAPINE	ANKS1B	rs7968606	www.ncbi.nlm.nih.gov/pubmed/19721433	GWAS	n/a	0.1114
OLANZAPINE	RF01848 - LINC01985	rs9862857	www.ncbi.nlm.nih.gov/pubmed/25944848	GWAS	n/a	0.1186
OLANZAPINE	NRG1	rs17673138	www.ncbi.nlm.nih.gov/pubmed/25944848	GWAS	n/a	0.0711
OLANZAPINE	LINGO2 - MIR876	rs10968749	www.ncbi.nlm.nih.gov/pubmed/25944848	GWAS	n/a	0.0968
OLANZAPINE	ZNF93	rs10405744	www.ncbi.nlm.nih.gov/pubmed/25944848	GWAS	n/a	0.1132
OLANZAPINE	CACNA1C	rs2239063	www.ncbi.nlm.nih.gov/pubmed/29503163	GWAS	n/a	0.2328
OLANZAPINE	CIB4	rs1731240	www.ncbi.nlm.nih.gov/pubmed/29503163	GWAS	n/a	0.3411
PALIPERIDONE	LINC01505	rs4335177	www.ncbi.nlm.nih.gov/pubmed/27846195	GWAS	n/a	0.5561
PALIPERIDONE	SVIL - AL353093.1	rs3006553	www.ncbi.nlm.nih.gov/pubmed/27846195	GWAS	2x(same study&compound)	-
PALIPERIDONE	SAMD4A	rs4901536	www.ncbi.nlm.nih.gov/pubmed/27846195	GWAS	2x(same study&compound)	0.5903
PALIPERIDONE	SPTLC2 - COX6CP11	rs59721556	www.ncbi.nlm.nih.gov/pubmed/27846195	GWAS	5x(same study&compound)	0.155
PALIPERIDONE	AL591504.1 - AL359976.1	rs34252091	www.ncbi.nlm.nih.gov/pubmed/27846195	GWAS	2x(same study&compound)	0.1492
PALIPERIDONE	PLD1	rs149053538	www.ncbi.nlm.nih.gov/pubmed/27846195	GWAS	n/a	0.1476
PALIPERIDONE	SIGLEC15	rs11082490	www.ncbi.nlm.nih.gov/pubmed/27846195	GWAS	2x(same study&compound)	0.2911
PALIPERIDONE	ADCK1	rs74065827	www.ncbi.nlm.nih.gov/pubmed/27846195	GWAS	2x(same study&compound)	0.101
PALIPERIDONE	CHCHD6	rs74405815	www.ncbi.nlm.nih.gov/pubmed/27846195	GWAS	n/a	0.0753
PALIPERIDONE	PHACTR2	rs6911131	www.ncbi.nlm.nih.gov/pubmed/27846195	GWAS	2x(same study&compound)	0.1118
PALIPERIDONE	RBFOX1 - RF00561	rs9930542	www.ncbi.nlm.nih.gov/pubmed/27846195	GWAS	n/a	0.1827
PALIPERIDONE	CR1	rs56161922	www.ncbi.nlm.nih.gov/pubmed/27846195	GWAS	2x(same study&compound)	0.1212
PALIPERIDONE	AC005871.2	rs2532643	www.ncbi.nlm.nih.gov/pubmed/27846195	GWAS	2x(same study&compound)	0.1212
PALIPERIDONE	SGCD	rs138538719	www.ncbi.nlm.nih.gov/pubmed/27846195	GWAS	2x(same study&compound)	0.0272
PALIPERIDONE	RNA5SP214 - VGLL2	rs142794624	www.ncbi.nlm.nih.gov/pubmed/27846195	GWAS	2x(same study&compound)	0.0679
PALIPERIDONE	RNF135	rs79533578	www.ncbi.nlm.nih.gov/pubmed/27846195	GWAS	n/a	0.0162
PALIPERIDONE	POMT2	rs142996120	www.ncbi.nlm.nih.gov/pubmed/27846195	GWAS	n/a	-
PALIPERIDONE	MYL6P5 - AC005144.1	rs2429928	www.ncbi.nlm.nih.gov/pubmed/27846195	GWAS	n/a	0.1803
PALIPERIDONE	LINC01366 - KCNIP1	rs76131026	www.ncbi.nlm.nih.gov/pubmed/27846195	GWAS	2x(same study&compound)	0.0038
PALIPERIDONE	CTNNA3	rs200868329	www.ncbi.nlm.nih.gov/pubmed/27846195	GWAS	n/a	-
PALIPERIDONE		chr12:106657179	www.ncbi.nlm.nih.gov/pubmed/27846195	GWAS	n/a	#N/A
PALIPERIDONE	LINC00284 - LINC00390	rs191581512	www.ncbi.nlm.nih.gov/pubmed/27846195	GWAS	2x(same study&compound)	0.0012
PALIPERIDONE	PIM3	rs117325373	www.ncbi.nlm.nih.gov/pubmed/27846195	GWAS	n/a	0.0166
PALIPERIDONE	EGFEM1P	rs115449435	www.ncbi.nlm.nih.gov/pubmed/27846195	GWAS	n/a	0.0056
PALIPERIDONE	USP24	rs113353280	www.ncbi.nlm.nih.gov/pubmed/27846195	GWAS	n/a	0.0024
PALIPERIDONE	ACTN4P1 - RNU6-119P	rs76540759	www.ncbi.nlm.nih.gov/pubmed/27846195	GWAS	n/a	0.0044
PALIPERIDONE	ZNF326 - RNU6-695P	rs146460178	www.ncbi.nlm.nih.gov/pubmed/27846195	GWAS	2x(same study&compound)	-
PALIPERIDONE	EGFEM1P	rs76289741	www.ncbi.nlm.nih.gov/pubmed/27846195	GWAS	n/a	0.0056
PALIPERIDONE	B9D1	rs72838804	www.ncbi.nlm.nih.gov/pubmed/27846195	GWAS	3x(same study&compound)	-
PALIPERIDONE	SLC5A10	rs111527967	www.ncbi.nlm.nih.gov/pubmed/27846195	GWAS	2x(same study&compound)	0.006
PALIPERIDONE	AL117329.1	rs147466853	www.ncbi.nlm.nih.gov/pubmed/27846195	GWAS	n/a	0.0068
PALIPERIDONE	CTSC - GAPDHP70	rs1451608	www.ncbi.nlm.nih.gov/pubmed/27846195	GWAS	n/a	0.0617
PALIPERIDONE	TUSC3 - PPM1AP1	rs145847018	www.ncbi.nlm.nih.gov/pubmed/27846195	GWAS	n/a	0.024
PALIPERIDONE	AC104042.1 - RF00322	rs75528631	www.ncbi.nlm.nih.gov/pubmed/27846195	GWAS	n/a	0.0106
PALIPERIDONE	STEAP2-AS1	rs147692810	www.ncbi.nlm.nih.gov/pubmed/27846195	GWAS	n/a	0.0677
PALIPERIDONE	SGCD	rs138538719	www.ncbi.nlm.nih.gov/pubmed/27846195	GWAS	2x(same study&compound)	0.0272
PALIPERIDONE	RBFOX1 - RF00561	rs5020196	www.ncbi.nlm.nih.gov/pubmed/27846195	GWAS	n/a	0.1546
PALIPERIDONE	SGCD	rs62382696	www.ncbi.nlm.nih.gov/pubmed/27846195	GWAS	2x(same study&compound)	0.0274
PALIPERIDONE	AC005871.2	rs2532643	www.ncbi.nlm.nih.gov/pubmed/27846195	GWAS	2x(same study&compound)	0.1212
PALIPERIDONE	POLN	rs9993696	www.ncbi.nlm.nih.gov/pubmed/27846195	GWAS	2x(same study&compound)	0.3217
PALIPERIDONE	ADCK1	rs56240334	www.ncbi.nlm.nih.gov/pubmed/27846195	GWAS	3x(same study&compound)	0.0907
PALIPERIDONE	PHACTR2	rs6911131	www.ncbi.nlm.nih.gov/pubmed/27846195	GWAS	2x(same study&compound)	0.1118
PALIPERIDONE	LINC02246, AF127577.4	rs11439302	www.ncbi.nlm.nih.gov/pubmed/27846195	GWAS	2x(same study&compound)	0.147
PALIPERIDONE	SPTLC2 - COX6CP11	rs12434701	www.ncbi.nlm.nih.gov/pubmed/27846195	GWAS	n/a	-
PALIPERIDONE	AP000769.3 - MALAT1	rs4102217	www.ncbi.nlm.nih.gov/pubmed/27846195	GWAS	n/a	0.1282
PALIPERIDONE	AC069439.1 - PPIAP74	rs73878431	www.ncbi.nlm.nih.gov/pubmed/27846195	GWAS	n/a	0.2676
PALIPERIDONE	AC005165.1 - AC010719.1	rs57425123	www.ncbi.nlm.nih.gov/pubmed/27846195	GWAS	n/a	-
PALIPERIDONE	AC060809.1, AC104041.1	rs3934047	www.ncbi.nlm.nih.gov/pubmed/27846195	GWAS	n/a	0.2911
PALIPERIDONE	AC092957.1	rs6440475	www.ncbi.nlm.nih.gov/pubmed/27846195	GWAS	n/a	0.4962
PALIPERIDONE	SVIL - AL353093.1	rs3006553	www.ncbi.nlm.nih.gov/pubmed/27846195	GWAS	2x(same study&compound)	-
PALIPERIDONE	LINC01220 - AF111167.2	rs4903318	www.ncbi.nlm.nih.gov/pubmed/27846195	GWAS	2x(same study&compound)	-
PALIPERIDONE	AC091078.1	rs1906727	www.ncbi.nlm.nih.gov/pubmed/27846195	GWAS	2x(same study&compound)	-
PALIPERIDONE	ZBBX	rs6777098	www.ncbi.nlm.nih.gov/pubmed/27846195	GWAS	n/a	-
PALIPERIDONE	ADGRE3	rs73506161	www.ncbi.nlm.nih.gov/pubmed/27846195	GWAS	2x(same study&compound)	0.1855
PALIPERIDONE	CSMD1	rs11984453	www.ncbi.nlm.nih.gov/pubmed/27846195	GWAS	n/a	0.0743
PALIPERIDONE	OXR1	rs73309282	www.ncbi.nlm.nih.gov/pubmed/27846195	GWAS	n/a	0.0391
PALIPERIDONE	EIF3F, EIF3F	rs10769859	www.ncbi.nlm.nih.gov/pubmed/27846195	GWAS	n/a	-
PALIPERIDONE		chr8:102010440	www.ncbi.nlm.nih.gov/pubmed/27846195	GWAS	n/a	#N/A
PALIPERIDONE	CWH43	rs77730715	www.ncbi.nlm.nih.gov/pubmed/27846195	GWAS	n/a	0.0108
PALIPERIDONE		chr3:24752415	www.ncbi.nlm.nih.gov/pubmed/27846195	GWAS	n/a	#N/A
PALIPERIDONE	AC007179.2, AC007100.1	rs6545747	www.ncbi.nlm.nih.gov/pubmed/27846195	GWAS	n/a	0.5204
PALIPERIDONE	PAEPP1 - AL354761.1	rs7859245	www.ncbi.nlm.nih.gov/pubmed/27846195	GWAS	n/a	-
PALIPERIDONE	NRP1	rs10827221	www.ncbi.nlm.nih.gov/pubmed/27846195	GWAS	n/a	0.4309
PALIPERIDONE	PSD3	rs2634458	www.ncbi.nlm.nih.gov/pubmed/27846195	GWAS	2x(same study&compound)	0.1294
PALIPERIDONE	ZWINT - RF01299	rs61857276	www.ncbi.nlm.nih.gov/pubmed/27846195	GWAS	2x(same study&compound)	0.0084
PALIPERIDONE	AC069545.1 - ZWINT	rs61854820	www.ncbi.nlm.nih.gov/pubmed/27846195	GWAS	3x(same study&compound)	0.0084
PALIPERIDONE	AC069545.1 - ZWINT	rs77217161	www.ncbi.nlm.nih.gov/pubmed/27846195	GWAS	3x(same study&compound)	0.0074
PALIPERIDONE	DKK3 - LINC02547	rs923806	www.ncbi.nlm.nih.gov/pubmed/27846195	GWAS	n/a	0.1092
PALIPERIDONE	CCDC122	rs78547569	www.ncbi.nlm.nih.gov/pubmed/27846195	GWAS	2x(same study&compound)	0.0024
PALIPERIDONE	MIR100HG	rs117752187	www.ncbi.nlm.nih.gov/pubmed/27846195	GWAS	n/a	0.0076
PALIPERIDONE	TUSC3	rs76830538	www.ncbi.nlm.nih.gov/pubmed/27846195	GWAS	n/a	0.0158
PALIPERIDONE	TUSC3 - PPM1AP1	rs117019455	www.ncbi.nlm.nih.gov/pubmed/27846195	GWAS	n/a	0.0164
PALIPERIDONE	AC027306.1, KCNIP1	rs75070487	www.ncbi.nlm.nih.gov/pubmed/27846195	GWAS	n/a	0.0076
PALIPERIDONE	LINC00964 - ZNF572	rs2382999	www.ncbi.nlm.nih.gov/pubmed/27846195	GWAS	n/a	0.2778
PALIPERIDONE	RBFOX1	rs188803409	www.ncbi.nlm.nih.gov/pubmed/27846195	GWAS	n/a	0.002
PALIPERIDONE	AP001970.1 - RF00096	rs79862545	www.ncbi.nlm.nih.gov/pubmed/27846195	GWAS	n/a	0.002
PALIPERIDONE	XKR6	rs149776388	www.ncbi.nlm.nih.gov/pubmed/27846195	GWAS	n/a	0.0032
PALIPERIDONE	CACNA1B	rs7036881	www.ncbi.nlm.nih.gov/pubmed/27846195	GWAS	n/a	-
PALIPERIDONE	LINC00284, AL512506.3	rs73177327	www.ncbi.nlm.nih.gov/pubmed/27846195	GWAS	n/a	0.002
PALIPERIDONE	OSCP1	rs138707712	www.ncbi.nlm.nih.gov/pubmed/27846195	GWAS	n/a	0.0068
PALIPERIDONE	SH3GL2 - ADAMTSL1	rs141473550	www.ncbi.nlm.nih.gov/pubmed/27846195	GWAS	n/a	0.0072
PALIPERIDONE	PRKN	rs117673608	www.ncbi.nlm.nih.gov/pubmed/27846195	GWAS	2x(same study&compound)	0.006
PALIPERIDONE	AP003390.1 - AP001994.1	rs73006788	www.ncbi.nlm.nih.gov/pubmed/27846195	GWAS	2x(same study&compound)	0.0058
PALIPERIDONE	PAEPP1 - AL354761.1	rs12001041	www.ncbi.nlm.nih.gov/pubmed/27846195	GWAS	n/a	0.1737
PALIPERIDONE	CCDC122	rs182333180	www.ncbi.nlm.nih.gov/pubmed/27846195	GWAS	2x(same study&compound)	0.0016
PALIPERIDONE	AC099654.4 - AC237221.2	rs180968789	www.ncbi.nlm.nih.gov/pubmed/27846195	GWAS	n/a	0.0054
PALIPERIDONE	IQGAP2	rs150202118	www.ncbi.nlm.nih.gov/pubmed/27846195	GWAS	n/a	0.0028
PALIPERIDONE	NSMCE2	rs201447509	www.ncbi.nlm.nih.gov/pubmed/27846195	GWAS	n/a	-
PALIPERIDONE	RF00017 - AC110588.1	rs2083117	www.ncbi.nlm.nih.gov/pubmed/27846195	GWAS	n/a	0.0899
PALIPERIDONE	RN7SKP279 - AP003532.1	rs147237795	www.ncbi.nlm.nih.gov/pubmed/27846195	GWAS	n/a	0.007
PALIPERIDONE	SGCZ	rs116939006	www.ncbi.nlm.nih.gov/pubmed/27846195	GWAS	n/a	0.0098
PALIPERIDONE	AFF3	rs28425639	www.ncbi.nlm.nih.gov/pubmed/27846195	GWAS	n/a	0.0687
PALIPERIDONE	CACNA1B	rs78178087	www.ncbi.nlm.nih.gov/pubmed/27846195	GWAS	n/a	0.0064
PALIPERIDONE	AC091114.1	rs78309295	www.ncbi.nlm.nih.gov/pubmed/27846195	GWAS	n/a	0.0064
PALIPERIDONE	PTPRT	rs79886049	www.ncbi.nlm.nih.gov/pubmed/27846195	GWAS	n/a	0.0222
PALIPERIDONE	AC034268.2	rs79851935	www.ncbi.nlm.nih.gov/pubmed/27846195	GWAS	n/a	0.0076
PALIPERIDONE	LINC00284 - LINC00390	rs191581512	www.ncbi.nlm.nih.gov/pubmed/27846195	GWAS	2x(same study&compound)	0.0012
PALIPERIDONE	LINC02098 - ETS1	rs117858172	www.ncbi.nlm.nih.gov/pubmed/27846195	GWAS	n/a	0.007
PALIPERIDONE	DPP10	rs7419486	www.ncbi.nlm.nih.gov/pubmed/27846195	GWAS	n/a	-
PALIPERIDONE	SGCZ	rs146790986	www.ncbi.nlm.nih.gov/pubmed/27846195	GWAS	n/a	0.029
PALIPERIDONE		chr2:71975709	www.ncbi.nlm.nih.gov/pubmed/27846195	GWAS	n/a	#N/A
PALIPERIDONE	ZWINT - RF01299	rs143325061	www.ncbi.nlm.nih.gov/pubmed/27846195	GWAS	n/a	0.0084
PALIPERIDONE	FAP	rs76799118	www.ncbi.nlm.nih.gov/pubmed/27846195	GWAS	n/a	0.012
PALIPERIDONE	AC018767.3	rs146767487	www.ncbi.nlm.nih.gov/pubmed/27846195	GWAS	n/a	0.006
PALIPERIDONE	FSTL5 - MTHFD2P4	rs182734081	www.ncbi.nlm.nih.gov/pubmed/27846195	GWAS	n/a	0.0052
PALIPERIDONE	AC011369.1, TENM2	rs74757231	www.ncbi.nlm.nih.gov/pubmed/27846195	GWAS	n/a	0.0068
PALIPERIDONE	ENOX1	rs189688109	www.ncbi.nlm.nih.gov/pubmed/27846195	GWAS	n/a	0.0042
PALIPERIDONE	RPL21P119 - LINC02177	rs77561866	www.ncbi.nlm.nih.gov/pubmed/27846195	GWAS	n/a	0.0062
PALIPERIDONE		chr17:60904543	www.ncbi.nlm.nih.gov/pubmed/27846195	GWAS	2x(same study&compound)	#N/A
PALIPERIDONE	AC069545.1 - ZWINT	rs61854820	www.ncbi.nlm.nih.gov/pubmed/27846195	GWAS	3x(same study&compound)	0.0084
PALIPERIDONE	AC245054.1 - RSPH14	rs150863502	www.ncbi.nlm.nih.gov/pubmed/27846195	GWAS	n/a	0.0036
PALIPERIDONE	LINC00709 - HSP90AB7P	rs117612853	www.ncbi.nlm.nih.gov/pubmed/27846195	GWAS	n/a	-
PALIPERIDONE	DDX43P2 - AC093775.1	rs117295891	www.ncbi.nlm.nih.gov/pubmed/27846195	GWAS	n/a	0.018
PALIPERIDONE	CR1L	rs4562622	www.ncbi.nlm.nih.gov/pubmed/27846195	GWAS	n/a	0.1224
PALIPERIDONE	LINC02223	rs11956350	www.ncbi.nlm.nih.gov/pubmed/27846195	GWAS	n/a	0.0104
PALIPERIDONE	AC069545.1 - ZWINT	rs77217161	www.ncbi.nlm.nih.gov/pubmed/27846195	GWAS	3x(same study&compound)	0.0074
PALIPERIDONE	HIBCH	rs59000197	www.ncbi.nlm.nih.gov/pubmed/27846195	GWAS	n/a	0.0854
PALIPERIDONE	AL590426.2 - AL365222.1	rs56031646	www.ncbi.nlm.nih.gov/pubmed/27846195	GWAS	n/a	0.0106
PALIPERIDONE	HMCN1 - PRG4	rs182020790	www.ncbi.nlm.nih.gov/pubmed/27846195	GWAS	n/a	0.0022
PALIPERIDONE	FSTL5	rs116557595	www.ncbi.nlm.nih.gov/pubmed/27846195	GWAS	n/a	0.0072
PALIPERIDONE	AZIN1-AS1	rs188710179	www.ncbi.nlm.nih.gov/pubmed/27846195	GWAS	n/a	0.0102
PALIPERIDONE	VPS45	rs7554419	www.ncbi.nlm.nih.gov/pubmed/27846195	GWAS	n/a	-
PALIPERIDONE	AC007381.1	rs139132350	www.ncbi.nlm.nih.gov/pubmed/27846195	GWAS	n/a	0.005
PALIPERIDONE	ZNF362	rs45496701	www.ncbi.nlm.nih.gov/pubmed/27846195	GWAS	n/a	0.0118
PALIPERIDONE	TDRP	rs141443024	www.ncbi.nlm.nih.gov/pubmed/27846195	GWAS	2x(same study&compound)	0.0038
PALIPERIDONE	PECR	rs1647768	www.ncbi.nlm.nih.gov/pubmed/27846195	GWAS	n/a	0.1132
PALIPERIDONE	ADCK1	rs34272020	www.ncbi.nlm.nih.gov/pubmed/27846195	GWAS	n/a	0.0765
PALIPERIDONE	ADCK1	rs56240334	www.ncbi.nlm.nih.gov/pubmed/27846195	GWAS	3x(same study&compound)	0.0907
PALIPERIDONE	AMBP	rs2567700	www.ncbi.nlm.nih.gov/pubmed/27846195	GWAS	n/a	0.2714
PALIPERIDONE	AMBP	rs12344124	www.ncbi.nlm.nih.gov/pubmed/27846195	GWAS	n/a	0.0697
PALIPERIDONE	ARHGEF28	rs73105738	www.ncbi.nlm.nih.gov/pubmed/27846195	GWAS	n/a	0.0447
PALIPERIDONE	AL445264.1 - MTCL1P1	rs77584330	www.ncbi.nlm.nih.gov/pubmed/27846195	GWAS	n/a	0.01
PALIPERIDONE	B9D1	rs72838804	www.ncbi.nlm.nih.gov/pubmed/27846195	GWAS	3x(same study&compound)	-
PALIPERIDONE	AC069439.1 - PPIAP74	rs6443921	www.ncbi.nlm.nih.gov/pubmed/27846195	GWAS	n/a	0.3429
PALIPERIDONE	TDRP	rs141443024	www.ncbi.nlm.nih.gov/pubmed/27846195	GWAS	2x(same study&compound)	0.0038
PALIPERIDONE	CALD1	rs10247392	www.ncbi.nlm.nih.gov/pubmed/27846195	GWAS	2x(same study&compound)	0.5523
PALIPERIDONE	CALD1	rs10247392	www.ncbi.nlm.nih.gov/pubmed/27846195	GWAS	2x(same study&compound)	0.5523
PALIPERIDONE	CCDC122	rs182333180	www.ncbi.nlm.nih.gov/pubmed/27846195	GWAS	2x(same study&compound)	0.0016
PALIPERIDONE	WDR82P2 - AL714022.1	rs115212412	www.ncbi.nlm.nih.gov/pubmed/27846195	GWAS	n/a	0.006
PALIPERIDONE	CR1	rs56161922	www.ncbi.nlm.nih.gov/pubmed/27846195	GWAS	2x(same study&compound)	0.1212
PALIPERIDONE	CSMD3 - AC103993.1	rs145712811	www.ncbi.nlm.nih.gov/pubmed/27846195	GWAS	n/a	0.0088
PALIPERIDONE	CWH43	rs55774002	www.ncbi.nlm.nih.gov/pubmed/27846195	GWAS	n/a	0.0381
PALIPERIDONE	ADGRE3	rs73506161	www.ncbi.nlm.nih.gov/pubmed/27846195	GWAS	2x(same study&compound)	0.1855
PALIPERIDONE	AL117329.1	rs151233144	www.ncbi.nlm.nih.gov/pubmed/27846195	GWAS	n/a	0.0094
PALIPERIDONE	IGLC7 - AC245054.2	rs144212837	www.ncbi.nlm.nih.gov/pubmed/27846195	GWAS	n/a	0.0036
PALIPERIDONE	AC008892.1	rs192381152	www.ncbi.nlm.nih.gov/pubmed/27846195	GWAS	n/a	0.1472
PALIPERIDONE	TUSC3 - PPM1AP1	rs201581573	www.ncbi.nlm.nih.gov/pubmed/27846195	GWAS	n/a	0.0184
PALIPERIDONE		chr17:60904543	www.ncbi.nlm.nih.gov/pubmed/27846195	GWAS	2x(same study&compound)	#N/A
PALIPERIDONE	CA12	rs67357741	www.ncbi.nlm.nih.gov/pubmed/27846195	GWAS	n/a	0.0188
PALIPERIDONE	NXN, NXN, NXN	rs200136777	www.ncbi.nlm.nih.gov/pubmed/27846195	GWAS	n/a	-
PALIPERIDONE		chr2:230347877	www.ncbi.nlm.nih.gov/pubmed/27846195	GWAS	n/a	#N/A
PALIPERIDONE	LINC02246, AF127577.4	rs11439302	www.ncbi.nlm.nih.gov/pubmed/27846195	GWAS	2x(same study&compound)	0.147
PALIPERIDONE		chr16:8606507	www.ncbi.nlm.nih.gov/pubmed/27846195	GWAS	n/a	#N/A
PALIPERIDONE	MYL6P5 - AC005144.1	rs2429929	www.ncbi.nlm.nih.gov/pubmed/27846195	GWAS	n/a	0.1797
PALIPERIDONE	ICE1 - AC010266.2	rs2560471	www.ncbi.nlm.nih.gov/pubmed/27846195	GWAS	2x(same study&compound)	0.9657
PALIPERIDONE	KIAA1549 - ZC3HAV1L	rs77301145	www.ncbi.nlm.nih.gov/pubmed/27846195	GWAS	n/a	0.0845
PALIPERIDONE	LINC00284 - LINC00390	rs181534711	www.ncbi.nlm.nih.gov/pubmed/27846195	GWAS	n/a	0.0016
PALIPERIDONE	AC006504.7 - AC010511.1	rs147515995	www.ncbi.nlm.nih.gov/pubmed/27846195	GWAS	n/a	0.006
PALIPERIDONE	LNX1-AS1, AC058822.1, LNX1	rs115342620	www.ncbi.nlm.nih.gov/pubmed/27846195	GWAS	n/a	0.0052
PALIPERIDONE	LINC01899 - AC027458.1	rs8094969	www.ncbi.nlm.nih.gov/pubmed/27846195	GWAS	n/a	-
PALIPERIDONE	LINC01366 - KCNIP1	rs76131026	www.ncbi.nlm.nih.gov/pubmed/27846195	GWAS	2x(same study&compound)	0.0038
PALIPERIDONE	LINC01220 - AF111167.2	rs4903318	www.ncbi.nlm.nih.gov/pubmed/27846195	GWAS	2x(same study&compound)	-
PALIPERIDONE	NFS1	rs7268897	www.ncbi.nlm.nih.gov/pubmed/27846195	GWAS	2x(same study&compound)	-
PALIPERIDONE	AL591504.1 - AL359976.1	rs34252091	www.ncbi.nlm.nih.gov/pubmed/27846195	GWAS	2x(same study&compound)	0.1492
PALIPERIDONE	PRKN	rs117673608	www.ncbi.nlm.nih.gov/pubmed/27846195	GWAS	2x(same study&compound)	0.006
PALIPERIDONE	PHF20	rs17093238	www.ncbi.nlm.nih.gov/pubmed/27846195	GWAS	2x(same study&compound)	0.0529
PALIPERIDONE	PHF20	rs17093238	www.ncbi.nlm.nih.gov/pubmed/27846195	GWAS	2x(same study&compound)	0.0529
PALIPERIDONE	POLN	rs9993696	www.ncbi.nlm.nih.gov/pubmed/27846195	GWAS	2x(same study&compound)	0.3217
PALIPERIDONE	POLN	rs1923775	www.ncbi.nlm.nih.gov/pubmed/27846195	GWAS	n/a	0.5561
PALIPERIDONE	GVQW3	rs4945082	www.ncbi.nlm.nih.gov/pubmed/27846195	GWAS	n/a	0.865
PALIPERIDONE	PRLR	rs74370740	www.ncbi.nlm.nih.gov/pubmed/27846195	GWAS	n/a	0.0371
PALIPERIDONE	PSD3	rs2634458	www.ncbi.nlm.nih.gov/pubmed/27846195	GWAS	2x(same study&compound)	0.1294
PALIPERIDONE	AP003390.1 - AP001994.1	rs73006788	www.ncbi.nlm.nih.gov/pubmed/27846195	GWAS	2x(same study&compound)	0.0058
PALIPERIDONE	RNA5SP214 - VGLL2	rs142794624	www.ncbi.nlm.nih.gov/pubmed/27846195	GWAS	2x(same study&compound)	0.0679
PALIPERIDONE	AC091078.1	rs1906727	www.ncbi.nlm.nih.gov/pubmed/27846195	GWAS	2x(same study&compound)	-
PALIPERIDONE	SAMD4A	rs4901536	www.ncbi.nlm.nih.gov/pubmed/27846195	GWAS	2x(same study&compound)	0.5903
PALIPERIDONE	SGCD	rs62380867	www.ncbi.nlm.nih.gov/pubmed/27846195	GWAS	2x(same study&compound)	0.0288
PALIPERIDONE	SGCD	rs62380867	www.ncbi.nlm.nih.gov/pubmed/27846195	GWAS	2x(same study&compound)	0.0288
PALIPERIDONE	SGCD	rs62382696	www.ncbi.nlm.nih.gov/pubmed/27846195	GWAS	2x(same study&compound)	0.0274
PALIPERIDONE	SIGLEC15	rs11082490	www.ncbi.nlm.nih.gov/pubmed/27846195	GWAS	2x(same study&compound)	0.2911
PALIPERIDONE	SLC17A6	rs1447514	www.ncbi.nlm.nih.gov/pubmed/27846195	GWAS	n/a	0.1312
PALIPERIDONE	SLC5A10	rs111527967	www.ncbi.nlm.nih.gov/pubmed/27846195	GWAS	2x(same study&compound)	0.006
PALIPERIDONE	SPTLC2 - COX6CP11	rs59721556	www.ncbi.nlm.nih.gov/pubmed/27846195	GWAS	5x(same study&compound)	0.155
PALIPERIDONE	LINC01644 - LINC00898	rs76989557	www.ncbi.nlm.nih.gov/pubmed/27846195	GWAS	n/a	0.0086
PALIPERIDONE	AC060809.1, AC104041.1	rs12915820	www.ncbi.nlm.nih.gov/pubmed/27846195	GWAS	2x(same study&compound)	0.271
PALIPERIDONE	AC060809.1, AC104041.1	rs12915820	www.ncbi.nlm.nih.gov/pubmed/27846195	GWAS	2x(same study&compound)	0.271
PALIPERIDONE	TOX	rs73249047	www.ncbi.nlm.nih.gov/pubmed/27846195	GWAS	n/a	0.0773
PALIPERIDONE	NPM1P28 - AC092925.1	rs111916630	www.ncbi.nlm.nih.gov/pubmed/27846195	GWAS	n/a	0.008
PALIPERIDONE	ZNF326 - RNU6-695P	rs146460178	www.ncbi.nlm.nih.gov/pubmed/27846195	GWAS	2x(same study&compound)	-
PALIPERIDONE	ZNF611	rs28785552	www.ncbi.nlm.nih.gov/pubmed/27846195	GWAS	n/a	0.3127
PALIPERIDONE	SGCD	rs138538719	www.ncbi.nlm.nih.gov/pubmed/27846195	GWAS	2x(same study&compound)	0.0272
PALIPERIDONE	LINC00499	rs80052780	www.ncbi.nlm.nih.gov/pubmed/27846195	GWAS	n/a	0.0755
PALIPERIDONE	AC069545.1 - ZWINT	rs61854820	www.ncbi.nlm.nih.gov/pubmed/27846195	GWAS	3x(same study&compound)	0.0084
PALIPERIDONE	ADCK1	rs74065827	www.ncbi.nlm.nih.gov/pubmed/27846195	GWAS	2x(same study&compound)	0.101
PALIPERIDONE	C3orf38	rs9815738	www.ncbi.nlm.nih.gov/pubmed/27846195	GWAS	n/a	0.7833
PALIPERIDONE	ZWINT - RF01299	rs61857276	www.ncbi.nlm.nih.gov/pubmed/27846195	GWAS	2x(same study&compound)	0.0084
PALIPERIDONE	CCDC122	rs78547569	www.ncbi.nlm.nih.gov/pubmed/27846195	GWAS	2x(same study&compound)	0.0024
PALIPERIDONE	SPTLC2 - COX6CP11	rs59721556	www.ncbi.nlm.nih.gov/pubmed/27846195	GWAS	5x(same study&compound)	0.155
PALIPERIDONE	OR10D1P - OR10D3	rs118106993	www.ncbi.nlm.nih.gov/pubmed/27846195	GWAS	n/a	0.0026
PALIPERIDONE	SERPINA1, SERPINA1	rs72706301	www.ncbi.nlm.nih.gov/pubmed/27846195	GWAS	n/a	0.0337
PALIPERIDONE	AC096559.1 - AC009486.1	rs56175057	www.ncbi.nlm.nih.gov/pubmed/27846195	GWAS	n/a	0.0791
PALIPERIDONE	PHF20	rs7267005	www.ncbi.nlm.nih.gov/pubmed/27846195	GWAS	n/a	0.0537
PALIPERIDONE	ENOX1	rs145463728	www.ncbi.nlm.nih.gov/pubmed/27846195	GWAS	n/a	0.003
PALIPERIDONE	LINC01220 - AF111167.2	rs12323387	www.ncbi.nlm.nih.gov/pubmed/27846195	GWAS	n/a	0.3776
PALIPERIDONE	PTPN6	rs7963446	www.ncbi.nlm.nih.gov/pubmed/27846195	GWAS	n/a	0.8083
PALIPERIDONE	EFNA5	rs464250	www.ncbi.nlm.nih.gov/pubmed/27846195	GWAS	n/a	-
PALIPERIDONE	DMAC1	rs10758913	www.ncbi.nlm.nih.gov/pubmed/27846195	GWAS	n/a	0.6625
PALIPERIDONE	AC012254.2, HDHD2	rs76297747	www.ncbi.nlm.nih.gov/pubmed/27846195	GWAS	n/a	-
PALIPERIDONE	AC069545.1 - ZWINT	rs77217161	www.ncbi.nlm.nih.gov/pubmed/27846195	GWAS	3x(same study&compound)	0.0074
PALIPERIDONE	NFS1	rs7268897	www.ncbi.nlm.nih.gov/pubmed/27846195	GWAS	2x(same study&compound)	-
PALIPERIDONE	PLCB1	rs6055808	www.ncbi.nlm.nih.gov/pubmed/27846195	GWAS	n/a	0.1018
PALIPERIDONE	COL26A1	rs145252195	www.ncbi.nlm.nih.gov/pubmed/27846195	GWAS	n/a	0.0433
PALIPERIDONE	IQGAP2	rs55728704	www.ncbi.nlm.nih.gov/pubmed/27846195	GWAS	n/a	0.0689
PALIPERIDONE	DLGAP2	rs80058639	www.ncbi.nlm.nih.gov/pubmed/27846195	GWAS	n/a	0.1082
PALIPERIDONE	SMC5 - KLF9	rs202106186	www.ncbi.nlm.nih.gov/pubmed/27846195	GWAS	n/a	0.0232
PALIPERIDONE	AC114689.3	rs6566288	www.ncbi.nlm.nih.gov/pubmed/27846195	GWAS	n/a	0.7332
PALIPERIDONE	AC027458.1	rs2685441	www.ncbi.nlm.nih.gov/pubmed/27846195	GWAS	n/a	0.5266
PALIPERIDONE	ANO4	rs644939	www.ncbi.nlm.nih.gov/pubmed/27846195	GWAS	n/a	0.3448
PALIPERIDONE	SPTLC2 - COX6CP11	rs59721556	www.ncbi.nlm.nih.gov/pubmed/27846195	GWAS	5x(same study&compound)	0.155
PALIPERIDONE	CELF2-DT - AL136452.1	rs11256768	www.ncbi.nlm.nih.gov/pubmed/27846195	GWAS	n/a	0.0942
PALIPERIDONE	RUNX2 - CLIC5	rs17288586	www.ncbi.nlm.nih.gov/pubmed/27846195	GWAS	n/a	0.0913
PALIPERIDONE	ADCK1	rs56374507	www.ncbi.nlm.nih.gov/pubmed/27846195	GWAS	n/a	0.0765
PALIPERIDONE	AC026167.1	rs116144992	www.ncbi.nlm.nih.gov/pubmed/27846195	GWAS	n/a	0.0437
PALIPERIDONE	VIPAS39	rs11624682	www.ncbi.nlm.nih.gov/pubmed/27846195	GWAS	n/a	0.025
PALIPERIDONE	RN7SL776P - PHBP14	rs7675231	www.ncbi.nlm.nih.gov/pubmed/27846195	GWAS	n/a	0.0815
PALIPERIDONE	ADCK1	rs56240334	www.ncbi.nlm.nih.gov/pubmed/27846195	GWAS	3x(same study&compound)	0.0907
PALIPERIDONE	B9D1	rs72838804	www.ncbi.nlm.nih.gov/pubmed/27846195	GWAS	3x(same study&compound)	-
PALIPERIDONE	LINC01899 - AC027458.1	rs8094969	www.ncbi.nlm.nih.gov/pubmed/27846195	GWAS	n/a	-
PALIPERIDONE	ZFAND6	rs201061212	www.ncbi.nlm.nih.gov/pubmed/27846195	GWAS	n/a	-
PALIPERIDONE	SPTLC2 - COX6CP11	rs59721556	www.ncbi.nlm.nih.gov/pubmed/27846195	GWAS	5x(same study&compound)	0.155
PALIPERIDONE	AC058822.1, LNX1-AS1, LNX1	rs183993610	www.ncbi.nlm.nih.gov/pubmed/27846195	GWAS	n/a	0.0124
PALIPERIDONE	AC093752.1, PDE5A	rs2127826	www.ncbi.nlm.nih.gov/pubmed/27846195	GWAS	n/a	0.4527
PALIPERIDONE	SGCD	rs111751755	www.ncbi.nlm.nih.gov/pubmed/27846195	GWAS	n/a	0.005
PALIPERIDONE	SGCD	rs17555185	www.ncbi.nlm.nih.gov/pubmed/27846195	GWAS	n/a	0.006
PALIPERIDONE		chr3:67336707	www.ncbi.nlm.nih.gov/pubmed/27846195	GWAS	n/a	#N/A
PALIPERIDONE	SLC47A2	rs9900497	www.ncbi.nlm.nih.gov/pubmed/27846195	GWAS	n/a	0.3772
PALIPERIDONE	ICE1 - AC010266.2	rs2560471	www.ncbi.nlm.nih.gov/pubmed/27846195	GWAS	2x(same study&compound)	0.9657
PALIPERIDONE		chr4:7352632	www.ncbi.nlm.nih.gov/pubmed/27846195	GWAS	n/a	#N/A
PALIPERIDONE	RASGRF2	rs190585232	www.ncbi.nlm.nih.gov/pubmed/27846195	GWAS	n/a	0.0176
PALIPERIDONE	EVL	rs34804741	www.ncbi.nlm.nih.gov/pubmed/27846195	GWAS	n/a	0.0118
PALIPERIDONE	ANO4	rs502697	www.ncbi.nlm.nih.gov/pubmed/27846195	GWAS	n/a	0.3468
PALIPERIDONE	PRMT8	rs61909487	www.ncbi.nlm.nih.gov/pubmed/27846195	GWAS	n/a	0.0174
PALIPERIDONE	PTPN13	rs113925979	www.ncbi.nlm.nih.gov/pubmed/27846195	GWAS	n/a	0.0024
PALIPERIDONE	AP001999.1 - AP003062.1	rs10894895	www.ncbi.nlm.nih.gov/pubmed/27846195	GWAS	n/a	0.369
PALIPERIDONE	AC062015.1 - MIR5702	rs76008570	www.ncbi.nlm.nih.gov/pubmed/27846195	GWAS	n/a	0.1248
PALIPERIDONE	TCERG1L	rs2944499	www.ncbi.nlm.nih.gov/pubmed/27846195	GWAS	n/a	0.5146
PALIPERIDONE	CACNA1S	rs3767510	www.ncbi.nlm.nih.gov/pubmed/27846195	GWAS	n/a	0.5954
PALIPERIDONE	LINC01220 - AF111167.2	rs8008002	www.ncbi.nlm.nih.gov/pubmed/27846195	GWAS	n/a	-
PALIPERIDONE	AC060809.1, AC104041.1	rs28403489	www.ncbi.nlm.nih.gov/pubmed/27846195	GWAS	n/a	0.3892
PERPHENAZINE	AL157944.1	rs11163585	www.ncbi.nlm.nih.gov/pubmed/20195266	GWAS	n/a	0.2021
PERPHENAZINE	AC093157.1	rs17410015	www.ncbi.nlm.nih.gov/pubmed/20195266	GWAS	n/a	0.0389
PERPHENAZINE	PXDN - MYT1L	rs6735179	www.ncbi.nlm.nih.gov/pubmed/20195266	GWAS	n/a	0.403
PERPHENAZINE	RNF144A	rs6741819	www.ncbi.nlm.nih.gov/pubmed/20195266	GWAS	n/a	0.2406
PERPHENAZINE	AC007100.1 - AC007381.1	rs10202231	www.ncbi.nlm.nih.gov/pubmed/20195266	GWAS	n/a	0.4589
PERPHENAZINE	C4orf54 - DAPP1	rs11735070	www.ncbi.nlm.nih.gov/pubmed/20195266	GWAS	n/a	0.3163
PERPHENAZINE	ASTN2	rs4838255	www.ncbi.nlm.nih.gov/pubmed/20195266	GWAS	n/a	0.9071
PERPHENAZINE	SOX5, SOX5-AS1	rs1464500	www.ncbi.nlm.nih.gov/pubmed/20195266	GWAS	n/a	-
PERPHENAZINE	CLMN	rs1187614	www.ncbi.nlm.nih.gov/pubmed/20195266	GWAS	n/a	0.3438
PERPHENAZINE	SHISA9	rs153091	www.ncbi.nlm.nih.gov/pubmed/20195266	GWAS	n/a	0.7825
PERPHENAZINE	FHOD3	rs17651157	www.ncbi.nlm.nih.gov/pubmed/20195266	GWAS	n/a	0.0992
PERPHENAZINE	AC074389.2 - ELFN1	rs13239071	www.ncbi.nlm.nih.gov/pubmed/29503163	GWAS (CAPC)	n/a	0.2081
PERPHENAZINE	DKK3	rs7116879	www.ncbi.nlm.nih.gov/pubmed/29503163	GWAS (CAPC)	n/a	0.236
PERPHENAZINE	FRA10AC1 - LGI1	rs75953396	www.ncbi.nlm.nih.gov/pubmed/29503163	GWAS (CAPC)	n/a	0.0381
PERPHENAZINE	AC093297.2 - AC114954.1	rs77989818	www.ncbi.nlm.nih.gov/pubmed/29503163	GWAS (CAPC)	n/a	0.0224
PERPHENAZINE	AP003497.1 - AP003497.2	rs7358476	www.ncbi.nlm.nih.gov/pubmed/29503163	GWAS (CAPC)	n/a	0.6807
QUETIAPINE	SLC22A23	rs4959235	www.ncbi.nlm.nih.gov/pubmed/20921969	GWAS & candidate gene	n/a	0.9617
QUETIAPINE	PDE4D	rs17382202	www.ncbi.nlm.nih.gov/pubmed/23241943	GWAS	n/a	0.1518
QUETIAPINE	FGF9 - RN7SL766P	rs518590	www.ncbi.nlm.nih.gov/pubmed/20195266	GWAS	n/a	0.15
QUETIAPINE	IGF1 - AC010202.1	rs150634721	www.ncbi.nlm.nih.gov/pubmed/29503163	GWAS (CAPC)	n/a	-
QUETIAPINE	SYF2P2 - AL353795.3	rs2802383	www.ncbi.nlm.nih.gov/pubmed/29503163	GWAS (CAPC)	n/a	0.3421
QUETIAPINE	ATP6V1G1P7 - RPL7P45	rs9554958	www.ncbi.nlm.nih.gov/pubmed/29503163	GWAS (CAPC)	n/a	0.5731
QUETIAPINE	GALNT10	rs76694263	www.ncbi.nlm.nih.gov/pubmed/29503163	GWAS (CAPC)	n/a	0.0567
QUETIAPINE	AL390957.1	rs16834649	www.ncbi.nlm.nih.gov/pubmed/29503163	GWAS (CAPC)	n/a	0.1655
QUETIAPINE	RN7SL338P - VCP	rs642296	www.ncbi.nlm.nih.gov/pubmed/29503163	GWAS (CAPC)	n/a	0.3425
QUETIAPINE	LINC02674 - AL513324.1	rs7088969	www.ncbi.nlm.nih.gov/pubmed/29503163	GWAS (CAPC)	n/a	0.5278
QUETIAPINE	AL390957.1	rs34624213	www.ncbi.nlm.nih.gov/pubmed/29503163	GWAS (CAPC)	n/a	0.1649
QUETIAPINE	LINC01310	rs28533249	www.ncbi.nlm.nih.gov/pubmed/29503163	GWAS (CAPC)	n/a	0.5317
QUETIAPINE	AL390957.1	rs3753947	www.ncbi.nlm.nih.gov/pubmed/29503163	GWAS (CAPC)	n/a	0.1687
QUETIAPINE	AC109492.1 - LINC01949	rs30419	www.ncbi.nlm.nih.gov/pubmed/29503163	GWAS (CAPC)	n/a	0.0463
QUETIAPINE	DNAJB5	rs4879848	www.ncbi.nlm.nih.gov/pubmed/29503163	GWAS (CAPC)	n/a	-
QUETIAPINE	SPOCK1	rs986359	www.ncbi.nlm.nih.gov/pubmed/29503163	GWAS (CAPC)	n/a	0.2171
QUETIAPINE	PIGO	rs568300	www.ncbi.nlm.nih.gov/pubmed/29503163	GWAS (CAPC)	n/a	0.474
QUETIAPINE	STOML2 - FAM214B	rs630961	www.ncbi.nlm.nih.gov/pubmed/29503163	GWAS (CAPC)	n/a	0.507
RISPERIDONE	GRM7	rs2133450	www.ncbi.nlm.nih.gov/pubmed/26856250	GWAS	n/a	0.368
RISPERIDONE	AL354872.2 - AL354872.1	rs10458561	www.ncbi.nlm.nih.gov/pubmed/20921969	GWAS	n/a	0.1957
RISPERIDONE	TSPYL5 - SNORD3H	rs6468544	www.ncbi.nlm.nih.gov/pubmed/20921969	GWAS	n/a	0.2316
RISPERIDONE	AC025281.1 - RNA5SP428	rs8050896	www.ncbi.nlm.nih.gov/pubmed/23241943	GWAS	n/a	0.1414
RISPERIDONE	TNFRSF11A - RPL17P44	rs2980976	www.ncbi.nlm.nih.gov/pubmed/23241943	GWAS	n/a	0.2438
RISPERIDONE	PPA2	rs2636697	www.ncbi.nlm.nih.gov/pubmed/23241943	GWAS	n/a	-
RISPERIDONE	TJP1, TJP1	rs711355	www.ncbi.nlm.nih.gov/pubmed/23241943	GWAS	n/a	0.639
RISPERIDONE	AL589923.1 - AL162391.1	rs888219	www.ncbi.nlm.nih.gov/pubmed/19721433	GWAS	n/a	0.7358
RISPERIDONE	CNTNAP5	rs17727261	www.ncbi.nlm.nih.gov/pubmed/19721433	GWAS	n/a	0.018
RISPERIDONE	TRPM1, TRPM1, AC009562.1	rs17815774	www.ncbi.nlm.nih.gov/pubmed/19721433	GWAS	n/a	-
RISPERIDONE	HCG20, HCG20, HCG20, HCG20, HCG20	rs12526186	www.ncbi.nlm.nih.gov/pubmed/19721433	GWAS	n/a	0.2624
RISPERIDONE	AC009411.2, AC018742.1	rs1117324	www.ncbi.nlm.nih.gov/pubmed/20195266	GWAS	n/a	0.8049
RISPERIDONE	AC008696.2	rs17100498	www.ncbi.nlm.nih.gov/pubmed/20195266	GWAS	n/a	-
RISPERIDONE	AP003063.1	rs7105881	www.ncbi.nlm.nih.gov/pubmed/20195266	GWAS	n/a	0.6675
RISPERIDONE	MEIS2	rs1568679	www.ncbi.nlm.nih.gov/pubmed/20195266	GWAS	n/a	0.1018
RISPERIDONE	ATF7IP2	rs13335336	www.ncbi.nlm.nih.gov/pubmed/20195266	GWAS	n/a	0.1148
RISPERIDONE	RPS2P6 - AC091305.1	rs8092443	www.ncbi.nlm.nih.gov/pubmed/20195266	GWAS	n/a	0.2155
RISPERIDONE	RPS2P6 - AC091305.1	rs11663206	www.ncbi.nlm.nih.gov/pubmed/20195266	GWAS	n/a	-
RISPERIDONE	RPL12P4 - LINC01440	rs6092078	www.ncbi.nlm.nih.gov/pubmed/20195266	GWAS	n/a	0.1254
RISPERIDONE	SLC1A1	rs16921385	www.ncbi.nlm.nih.gov/pubmed/29503163	GWAS (CAPC)	n/a	0.2348
ZIPRASIDONE	AP006295.1 - RNU6-544P	rs7395555	www.ncbi.nlm.nih.gov/pubmed/23241943	GWAS	n/a	0.1599
ZIPRASIDONE	AC093913.1 - RF01210	rs17390445	www.ncbi.nlm.nih.gov/pubmed/19721433	GWAS	n/a	-
ZIPRASIDONE	EMCN - PPP3CA	rs1405687	www.ncbi.nlm.nih.gov/pubmed/20195266	GWAS	n/a	0.1577
ZIPRASIDONE	Z85994.2 - LINC01656	rs737724	www.ncbi.nlm.nih.gov/pubmed/29503163	GWAS (CAPC)	n/a	0.3862
ZIPRASIDONE	LINC00303 - SOX13	rs12567918	www.ncbi.nlm.nih.gov/pubmed/29503163	GWAS (CAPC)	n/a	0.5156
ZIPRASIDONE	AC106868.1 - PCDH7	rs10012947	www.ncbi.nlm.nih.gov/pubmed/29503163	GWAS (CAPC)	n/a	0.3812
ZIPRASIDONE	LINC00303	rs12133007	www.ncbi.nlm.nih.gov/pubmed/29503163	GWAS (CAPC)	n/a	0.6084
ZIPRASIDONE	AC116337.3	rs4320241	www.ncbi.nlm.nih.gov/pubmed/29503163	GWAS (CAPC)	n/a	0.3253
ZIPRASIDONE	AC025539.1 - AC005699.1	rs183547317	www.ncbi.nlm.nih.gov/pubmed/29503163	GWAS (CAPC)	n/a	0.012
ZIPRASIDONE	ZP1	rs3862662	www.ncbi.nlm.nih.gov/pubmed/29503163	GWAS (CAPC)	n/a	0.3417
ZIPRASIDONE	AC093766.1	rs59730210	www.ncbi.nlm.nih.gov/pubmed/29503163	GWAS (CAPC)	n/a	0.0799
ZIPRASIDONE	LINC00303 - SOX13	rs56080959	www.ncbi.nlm.nih.gov/pubmed/29503163	GWAS (CAPC)	n/a	-
LURASIDONE	AC100807.1, AC087354.1	rs4736253	https://www.ncbi.nlm.nih.gov/pubmed/29730043	GWAS	2x(same study&compound)	0.7562
LURASIDONE	DYNC2H1, AP002989.1	rs10895475	https://www.ncbi.nlm.nih.gov/pubmed/29730043	GWAS	n/a	0.4002
LURASIDONE	CTNNA2	rs10180106	https://www.ncbi.nlm.nih.gov/pubmed/29730043	GWAS	2x(same study&compound)	0.1709
LURASIDONE	STXBP5L, LINC02049	rs511841	https://www.ncbi.nlm.nih.gov/pubmed/29730043	GWAS	n/a	0.1901
LURASIDONE	STXBP5L	rs7620938	https://www.ncbi.nlm.nih.gov/pubmed/29730043	GWAS	n/a	0.1631
LURASIDONE	AC100807.1, AC087354.1	rs4736253	https://www.ncbi.nlm.nih.gov/pubmed/29730043	GWAS	2x(same study&compound)	0.7562
LURASIDONE	CTNNA2	rs10180106	https://www.ncbi.nlm.nih.gov/pubmed/29730043	GWAS	2x(same study&compound)	0.1709
LURASIDONE	RN7SKP123, RNU6-210P	rs524045	https://www.ncbi.nlm.nih.gov/pubmed/29730043	GWAS	n/a	-
LURASIDONE	TENM4	rs642516	https://www.ncbi.nlm.nih.gov/pubmed/29730043	GWAS	n/a	0.3682
LURASIDONE	EYS	rs4507566	https://www.ncbi.nlm.nih.gov/pubmed/29730043	GWAS	n/a	-
LURASIDONE	RNA5SP166, AC108935.1	rs60354593	https://www.ncbi.nlm.nih.gov/pubmed/29730043	GWAS	n/a	0.2107
LURASIDONE	RF00012, PRLR	rs26193	https://www.ncbi.nlm.nih.gov/pubmed/29730043	GWAS	n/a	0.3804
LURASIDONE	LINC00460, RPL35P9	rs12857574	https://www.ncbi.nlm.nih.gov/pubmed/29730043	GWAS	n/a	0.2171
ESCITALOPRAM	PLPPR4 - AL365220.1	rs111365677	www.ncbi.nlm.nih.gov/pubmed/27622933	GWAS (23andMe)	2x (same study; other compound)	0.0032
ESCITALOPRAM	SPSB4	rs142484554	www.ncbi.nlm.nih.gov/pubmed/27622933	GWAS (23andMe)	2x (same study; other compound)	0.0545
ESCITALOPRAM	ATP5MD	rs188843168	www.ncbi.nlm.nih.gov/pubmed/27622933	GWAS (23andMe)	2x (same study; other compound)	0.0004
ESCITALOPRAM	AC022201.1	rs6546604	www.ncbi.nlm.nih.gov/pubmed/27622933	GWAS (23andMe)	2x (same study; other compound)	0.4285
ESCITALOPRAM	APBB2	rs34177316	www.ncbi.nlm.nih.gov/pubmed/27622933	GWAS (23andMe)	2x (same study; other compound)	-
ESCITALOPRAM	AP002765.1 - ZNF202	rs201921722	www.ncbi.nlm.nih.gov/pubmed/27622933	GWAS (23andMe)	2x (same study; other compound)	-
ESCITALOPRAM	TFAP2D	rs80278479	www.ncbi.nlm.nih.gov/pubmed/27622933	GWAS (23andMe)	2x (same study; other compound)	0.0018
ESCITALOPRAM	CSE1L	rs6063349	www.ncbi.nlm.nih.gov/pubmed/27622933	GWAS (23andMe)	2x (same study; other compound)	-
ESCITALOPRAM	CSTF3	rs142641502	www.ncbi.nlm.nih.gov/pubmed/27622933	GWAS (23andMe)	2x (same study; other compound)	0.0016
ESCITALOPRAM	FOXF2 - RN7SL352P	rs201569130	www.ncbi.nlm.nih.gov/pubmed/27622933	GWAS (23andMe)	2x (same study; other compound)	0.0056
ESCITALOPRAM	DRAIC - TLE3	rs1548076	www.ncbi.nlm.nih.gov/pubmed/27622933	GWAS (23andMe)	2x (same study; other compound)	0.9321
ESCITALOPRAM	CORO1B - GPR152	rs182377406	www.ncbi.nlm.nih.gov/pubmed/27622933	GWAS (23andMe)	2x (same study; other compound)	0.0008
ESCITALOPRAM	ARL6IP1P3 - AP002759.1	rs74860738	www.ncbi.nlm.nih.gov/pubmed/27622933	GWAS (23andMe)	2x (same study; other compound)	0.1324
ESCITALOPRAM	AL135936.1 - SLC24A3	rs143934587	www.ncbi.nlm.nih.gov/pubmed/27622933	GWAS (23andMe)	2x (same study; other compound)	0.01
ESCITALOPRAM	LINC01618	rs189864513	www.ncbi.nlm.nih.gov/pubmed/27622933	GWAS (23andMe)	2x (same study; other compound)	0.0028
ESCITALOPRAM	DGKG	rs11924809	www.ncbi.nlm.nih.gov/pubmed/27622933	GWAS (23andMe)	2x (same study; other compound)	-
ESCITALOPRAM	NT5C2	rs117375960	www.ncbi.nlm.nih.gov/pubmed/27622933	GWAS (23andMe)	2x (same study; other compound)	0.0004
BUPROPION	SACM1L	rs2742417	www.ncbi.nlm.nih.gov/pubmed/22041458	GWAS	n/a	0.3992
BUPROPION	PGAM1P5	rs7136572	www.ncbi.nlm.nih.gov/pubmed/22041458	GWAS	n/a	0.1362
BUPROPION	WDFY4	rs10857636	www.ncbi.nlm.nih.gov/pubmed/22041458	GWAS	n/a	0.0345
BUPROPION	AC006043.1, MAGI2	rs17150687	www.ncbi.nlm.nih.gov/pubmed/22041458	GWAS	n/a	0.025
BUPROPION	AC097535.1 - AC016687.3	rs10517287	www.ncbi.nlm.nih.gov/pubmed/22041458	GWAS	2x(other study; other compound)	0.1681
BUPROPION	AGBL1	rs17647114	www.ncbi.nlm.nih.gov/pubmed/22041458	GWAS	2x(other study; other compound)	0.0343
BUPROPION	GPRIN3 - AC097478.1	rs1908557	www.ncbi.nlm.nih.gov/pubmed/27622933	GWAS	n/a	0.3866
BUPROPION	BAZ1A	rs77945277	www.ncbi.nlm.nih.gov/pubmed/27622933	GWAS	n/a	0.0026
BUPROPION	AL358215.3	rs4839421	www.ncbi.nlm.nih.gov/pubmed/27622933	GWAS	n/a	0.3824
BUPROPION	AC090458.1 - AC109810.1	rs75995702	www.ncbi.nlm.nih.gov/pubmed/27622933	GWAS	n/a	0.0012
BUPROPION	AC007718.1 - AC091193.1	rs34102224	www.ncbi.nlm.nih.gov/pubmed/27622933	GWAS	n/a	0.1004
BUPROPION	BHLHE41, SSPN	rs200855945	www.ncbi.nlm.nih.gov/pubmed/27622933	GWAS	n/a	-
BUPROPION	AC107222.1 - ENPP6	rs112538845	www.ncbi.nlm.nih.gov/pubmed/27622933	GWAS	n/a	0.008
BUPROPION	CUL3 - CCDC195	rs78087832	www.ncbi.nlm.nih.gov/pubmed/27622933	GWAS	n/a	0.0016
BUPROPION	TNC, DEC1	rs112106319	www.ncbi.nlm.nih.gov/pubmed/27622933	GWAS	n/a	0.0016
BUPROPION	NAV3	rs73425402	www.ncbi.nlm.nih.gov/pubmed/27622933	GWAS	n/a	0.0423
BUPROPION	FYB1	rs201203751	www.ncbi.nlm.nih.gov/pubmed/27622933	GWAS	n/a	-
BUPROPION	NLK	rs183124483	www.ncbi.nlm.nih.gov/pubmed/27622933	GWAS	n/a	0.0006
BUPROPION	HCN1 - AC122694.1	rs56388524	www.ncbi.nlm.nih.gov/pubmed/27622933	GWAS	n/a	0.0076
BUPROPION	ADAMTS6	rs143405544	www.ncbi.nlm.nih.gov/pubmed/27622933	GWAS	n/a	0.0052
BUPROPION	ZHX3	rs183042538	www.ncbi.nlm.nih.gov/pubmed/27622933	GWAS	n/a	0.0116
CITALOPRAM	AC097535.1 - AC016687.3	rs10517287	www.ncbi.nlm.nih.gov/pubmed/22041458	GWAS (STAR*D)	2x(other study; other compound)	0.1681
CITALOPRAM	AGBL1	rs17647114	www.ncbi.nlm.nih.gov/pubmed/22041458	GWAS (STAR*D)	2x(other study; other compound)	0.0343
CITALOPRAM	LINC00276	rs16861531	www.ncbi.nlm.nih.gov/pubmed/22041458	GWAS (STAR*D)	n/a	0.0499
CITALOPRAM	AC066595.1 - CHL1-AS2	rs6795349	www.ncbi.nlm.nih.gov/pubmed/22041458	GWAS (STAR*D)	n/a	0.0637
CITALOPRAM	RF00026 - HSP90AB2P	rs491376	www.ncbi.nlm.nih.gov/pubmed/22041458	GWAS (STAR*D)	n/a	0.9794
CITALOPRAM	RF00026 - HSP90AB2P	rs573332	www.ncbi.nlm.nih.gov/pubmed/22041458	GWAS (STAR*D)	n/a	-
CITALOPRAM	ZDHHC14	rs2163287	www.ncbi.nlm.nih.gov/pubmed/22041458	GWAS (STAR*D)	n/a	0.0329
CITALOPRAM	AC105031.1 - AC090095.1	rs7015622	www.ncbi.nlm.nih.gov/pubmed/22041458	GWAS (STAR*D)	n/a	0.0166
CITALOPRAM	AL391056.1 - NTMT1	rs10988449	www.ncbi.nlm.nih.gov/pubmed/22041458	GWAS (STAR*D)	n/a	0.152
CITALOPRAM	DTWD1	rs8039808	www.ncbi.nlm.nih.gov/pubmed/22041458	GWAS (STAR*D)	n/a	-
CITALOPRAM	AC018767.2	rs2034588	www.ncbi.nlm.nih.gov/pubmed/22041458	GWAS (STAR*D)	n/a	0.0475
CITALOPRAM	LGALS2 - GGA1	rs12157904	www.ncbi.nlm.nih.gov/pubmed/22041458	GWAS (STAR*D)	n/a	0.1526
CITALOPRAM	FOXD2 - AL356458.1	rs527430	www.ncbi.nlm.nih.gov/pubmed/22041458	GWAS (STAR*D)	n/a	0.0347
CITALOPRAM	CASC8 - AC104370.1	rs17766217	www.ncbi.nlm.nih.gov/pubmed/22041458	GWAS (STAR*D)	n/a	-
CITALOPRAM	PLPPR4 - AL365220.1	rs111365677	www.ncbi.nlm.nih.gov/pubmed/27622932	GWAS (23andMe)	2x (same study; other compound)	0.0032
CITALOPRAM	SPSB4	rs142484554	www.ncbi.nlm.nih.gov/pubmed/27622933	GWAS (23andMe)	2x (same study; other compound)	0.0545
CITALOPRAM	ATP5MD	rs188843168	www.ncbi.nlm.nih.gov/pubmed/27622933	GWAS (23andMe)	2x (same study; other compound)	0.0004
CITALOPRAM	AC022201.1	rs6546604	www.ncbi.nlm.nih.gov/pubmed/27622933	GWAS (23andMe)	2x (same study; other compound)	0.4285
CITALOPRAM	APBB2	rs34177316	www.ncbi.nlm.nih.gov/pubmed/27622933	GWAS (23andMe)	2x (same study; other compound)	-
CITALOPRAM	AP002765.1 - ZNF202	rs201921722	www.ncbi.nlm.nih.gov/pubmed/27622933	GWAS (23andMe)	2x (same study; other compound)	-
CITALOPRAM	TFAP2D	rs80278479	www.ncbi.nlm.nih.gov/pubmed/27622933	GWAS (23andMe)	2x (same study; other compound)	0.0018
CITALOPRAM	CSE1L	rs6063349	www.ncbi.nlm.nih.gov/pubmed/27622933	GWAS (23andMe)	2x (same study; other compound)	-
CITALOPRAM	CSTF3	rs142641502	www.ncbi.nlm.nih.gov/pubmed/27622933	GWAS (23andMe)	2x (same study; other compound)	0.0016
CITALOPRAM	FOXF2 - RN7SL352P	rs201569130	www.ncbi.nlm.nih.gov/pubmed/27622933	GWAS (23andMe)	2x (same study; other compound)	0.0056
CITALOPRAM	DRAIC - TLE3	rs1548076	www.ncbi.nlm.nih.gov/pubmed/27622933	GWAS (23andMe)	2x (same study; other compound)	0.9321
CITALOPRAM	CORO1B - GPR152	rs182377406	www.ncbi.nlm.nih.gov/pubmed/27622933	GWAS (23andMe)	2x (same study; other compound)	0.0008
CITALOPRAM	ARL6IP1P3 - AP002759.1	rs74860738	www.ncbi.nlm.nih.gov/pubmed/27622933	GWAS (23andMe)	2x (same study; other compound)	0.1324
CITALOPRAM	AL135936.1 - SLC24A3	rs143934587	www.ncbi.nlm.nih.gov/pubmed/27622933	GWAS (23andMe)	2x (same study; other compound)	0.01
CITALOPRAM	LINC01618	rs189864513	www.ncbi.nlm.nih.gov/pubmed/27622933	GWAS (23andMe)	2x (same study; other compound)	0.0028
CITALOPRAM	DGKG	rs11924809	www.ncbi.nlm.nih.gov/pubmed/27622933	GWAS (23andMe)	2x (same study; other compound)	-
CITALOPRAM	NT5C2	rs117375960	www.ncbi.nlm.nih.gov/pubmed/27622933	GWAS (23andMe)	2x (same study; other compound)	0.0004
DULOXETINE	AC026202.1 - AC087857.1	rs4685959	www.ncbi.nlm.nih.gov/pubmed/28696415	GWAS	n/a	-
DULOXETINE	LCORL - AC093898.1	rs13147572	www.ncbi.nlm.nih.gov/pubmed/28696416	GWAS	n/a	0.366
SERTRALINE	AC007422.2 - LINC01812	rs13432159	www.ncbi.nlm.nih.gov/pubmed/22041458	GWAS (STAR*D)	n/a	0.0671
SERTRALINE	AC007422.2 - LINC01812	rs6724422	www.ncbi.nlm.nih.gov/pubmed/22041458	GWAS (STAR*D)	n/a	0.0489
VENLAFAXINE	LINC02103 - RNU6-909P	rs11949289	www.ncbi.nlm.nih.gov/pubmed/22041458	GWAS (STAR*D)	n/a	0.2684
VENLAFAXINE	POLG	rs2307441	www.ncbi.nlm.nih.gov/pubmed/28437668	GWAS	n/a	0.0114
VENLAFAXINE	DYSF - RPS20P10	rs6712232	www.ncbi.nlm.nih.gov/pubmed/28437668	GWAS	n/a	0.095
VENLAFAXINE	AGAP1	rs75965524	www.ncbi.nlm.nih.gov/pubmed/28437668	GWAS	n/a	0.0092
VENLAFAXINE	AL356277.3 - AL356473.1	rs6918679	www.ncbi.nlm.nih.gov/pubmed/28437668	GWAS	n/a	-
VENLAFAXINE	RPSAP53 - LINC00364	rs3013580	www.ncbi.nlm.nih.gov/pubmed/28437668	GWAS	n/a	0.8077
VENLAFAXINE	AL646090.2 - LINC02549	rs76778048	www.ncbi.nlm.nih.gov/pubmed/28437668	GWAS	n/a	0.0198
VENLAFAXINE	AP000251.1 - FBXW11P1	rs2070419	www.ncbi.nlm.nih.gov/pubmed/28437668	GWAS	n/a	0.1767
VENLAFAXINE	PCP4	rs3819595	www.ncbi.nlm.nih.gov/pubmed/28437668	GWAS	n/a	0.2141
VENLAFAXINE	MCPH1, MCPH1-AS1	rs3020264	www.ncbi.nlm.nih.gov/pubmed/28437668	GWAS	n/a	0.1785
VENLAFAXINE	CSMD2	rs10914746	www.ncbi.nlm.nih.gov/pubmed/28437668	GWAS	n/a	0.1993
VENLAFAXINE	AL161616.2	rs7984972	www.ncbi.nlm.nih.gov/pubmed/28437668	GWAS	n/a	0.4199
VENLAFAXINE	ANGEL1	rs7152947	www.ncbi.nlm.nih.gov/pubmed/28437668	GWAS	n/a	0.2694
VENLAFAXINE	LRRC74A	rs8020289	www.ncbi.nlm.nih.gov/pubmed/28437668	GWAS	n/a	0.3361
VENLAFAXINE	RNU1-138P - CAMK2D	rs13129231	www.ncbi.nlm.nih.gov/pubmed/28437668	GWAS	n/a	0.2997
VENLAFAXINE	AC067751.1, ADO	rs2236295	www.ncbi.nlm.nih.gov/pubmed/28437668	GWAS	n/a	-
VENLAFAXINE	ZRANB2-AS2, NEGR1	rs977145	www.ncbi.nlm.nih.gov/pubmed/28437668	GWAS	n/a	0.6793
VENLAFAXINE	RN7SKP114 - AL354989.1	rs7853333	www.ncbi.nlm.nih.gov/pubmed/28437668	GWAS	n/a	-
OXCARBAZEPINE	LINC01808	rs1718641	www.ncbi.nlm.nih.gov/pubmed/30868120	GWAS	n/a	0.4722
OXCARBAZEPINE	AC091493.1 - PLCL2	rs9833158	www.ncbi.nlm.nih.gov/pubmed/30868120	GWAS	n/a	0.367
OXCARBAZEPINE	AC008568.2 - RPL23AP44	rs4895178	www.ncbi.nlm.nih.gov/pubmed/30868120	GWAS	n/a	0.3908
OXCARBAZEPINE	AC008892.1	rs148646711	www.ncbi.nlm.nih.gov/pubmed/30868120	GWAS	n/a	0.0551
OXCARBAZEPINE	OLFML3	rs1394074	www.ncbi.nlm.nih.gov/pubmed/30868120	GWAS	n/a	0.0262
OXCARBAZEPINE	AC022509.2, AC024145.1	rs7300380	www.ncbi.nlm.nih.gov/pubmed/30868120	GWAS	n/a	0.8119
OXCARBAZEPINE	TEAD3	rs72894781	www.ncbi.nlm.nih.gov/pubmed/30868120	GWAS	n/a	0.0445
	Additional Table 1. Summary information for the identified drug SNP-correllations. Information about the Drug, the SNP, the gene, the PubMed study ID, the type of GWAS study and the 1000Genomes MAF. Additional information includes specific SNPs (highlighted with red) for which the association was replicated either within the same study or in a different study; for the same drug compound or for a …

## Sheet: Additional_Table_2
DRUG	MAPPED_GENE	SNP
ARIPIPRAZOLE	CNTN4	rs17022006
ARIPIPRAZOLE	TENM2	rs68057166
CLOZAPINE	MDFIC	rs2709505
CLOZAPINE	AL358942.1 - AL360085.1	rs10457252
CLOZAPINE	LEKR1	rs17382119
CLOZAPINE	AC044784.1 - LINC00709	rs1149933
CLOZAPINE	AC011193.1 - C17orf102	rs17662217
CLOZAPINE	WWOX	rs11642282
CLOZAPINE	CHST15 - OAT	rs11818084
CLOZAPINE	NSMAF - TOX	rs1387221
CLOZAPINE	SHANK1	rs12460584
CLOZAPINE	C7 - MROH2B	rs7732104
CLOZAPINE	TMCC3 - KRT19P2	rs7968270
CLOZAPINE	B4GALT4	rs6438504
CLOZAPINE	LINC02151 - AP000770.2	rs17492380
CLOZAPINE	CTNNA2	rs399885
CLOZAPINE	CTNNA2	rs7570469
CLOZAPINE	ST6GALNAC2P1 - FUNDC2P2	rs1534238
CLOZAPINE	RNU6-440P - AC069148.1	rs17385675
CLOZAPINE	PPARD	rs9658108
CLOZAPINE	AL450338.1 - RNU4-12P	rs1577917
CLOZAPINE	AC019117.1	rs10499504
CLOZAPINE	AC006387.1, PRKAR2B	rs13224682
CLOZAPINE	ARL2BPP7 - RNU6-329P	rs320209
CLOZAPINE	SLC39A12 - CACNB2	rs17661538
CLOZAPINE	ZNF438 - LINC02664	rs2994684
CLOZAPINE	KIRREL3	rs620875
CLOZAPINE	CDH13	rs17216786
CLOZAPINE	MYT1 - PCMTD2	rs6011368
CLOZAPINE	DLGAP2	rs17739794
CLOZAPINE	UGT1A9, UGT1A10, UGT1A5, UGT1A8, UGT1A4, UGT1A7, UGT1A6	rs2011425
CLOZAPINE	AC021146.8 - UGT2B10	rs11725502
CLOZAPINE	CYP1A1 - CYP1A2	rs2472297
CLOZAPINE	AC093720.1 - AC021146.8	rs10023464
CLOZAPINE	CYP2C19, AL583836.1	rs12767583
CLOZAPINE	AC111000.6 - AC111000.1	rs7668556
CLOZAPINE	HLA-B, HLA-B, HLA-B, HLA-B, HLA-B, HLA-B	rs41549217
CLOZAPINE	AL355095.1 - AL359238.1	rs148071215
CLOZAPINE	RN7SL178P - CLDN23	rs111703385
CLOZAPINE	SILC1	rs12993904
CLOZAPINE	TEX9	rs144803255
CLOZAPINE	RAD23A	rs45495792
CLOZAPINE	KANSL2	rs118067775
CLOZAPINE	NMNAT2	rs41314643
CLOZAPINE	TAL1, AL135960.1	rs11211480
CLOZAPINE	COL24A1 - AL136382.1	rs61800638
CLOZAPINE	AC099329.2, ACKR2, KRBOX1, AC092042.3	rs10865924
CLOZAPINE	LINC00507 - LINC02441	rs12809497
CLOZAPINE	AL590365.1	rs17156371
CLOZAPINE	XRCC4	rs114397494
CLOZAPINE	LINC01707	rs3123012
CLOZAPINE	TMTC3 - RF00019	rs112511621
CLOZAPINE	JPH2	rs62204504
CLOZAPINE	VPS54	rs6546043
CLOZAPINE	ADAMTS9-AS2	rs10510921
CLOZAPINE	FARP1	rs9513373
CLOZAPINE	AC011586.2	rs73201717
CLOZAPINE	LPGAT1-AS1 - AC092814.1	rs2808382
CLOZAPINE	LINC02016	rs7428297
CLOZAPINE	CHI3L1 - CHIT1	rs115384187
CLOZAPINE	LILRB4, LILRB4, LILRB4, LILRB4	rs425283
CLOZAPINE	AC113347.4	rs116688600
CLOZAPINE	AC092013.1 - SOCS5P1	rs17312438
CLOZAPINE	NFASC	rs2068666
CLOZAPINE	ACKR1, CADM3-AS1	rs2814778
CLOZAPINE	ZNF618	rs77198048
CLOZAPINE	AC011604.2	rs149104283
CLOZAPINE	RNU6-67P - SLITRK1	rs80208670
CLOZAPINE	ADGRL2	rs184597564
CLOZAPINE	GSAP	rs78900159
CLOZAPINE	LINC00845 - TMEM26	rs16916041
CLOZAPINE	RN7SL557P - AQP8	rs11649311
CLOZAPINE	AC105021.1 - TMEM100	rs117202297
CLOZAPINE	LINC02093 - HS3ST3A1	rs80282661
CLOZAPINE	AC097066.1 - LINC01748	rs185053659
CLOZAPINE	SCN8A	rs143888465
CLOZAPINE	GRM7	rs3749448
CLOZAPINE	AGER - AL662884.1	rs1800625
HALOPERIDOL	ARID5B - RTKN2	rs7912580
HALOPERIDOL	EIF2AK4	rs2412459
HALOPERIDOL	AJAP1 - BX005132.2	rs760816
HALOPERIDOL	NPVF - AC004129.3	rs929255
HALOPERIDOL	CNTNAP4	rs13338060
HALOPERIDOL	AC113167.1	rs73770737
HALOPERIDOL	ZNF665	rs138126300
HALOPERIDOL	RF00019 - AL135938.1	rs1885572
ILOPERIDONE	NUBPL	rs7142881
ILOPERIDONE	CERKL	rs993648
ILOPERIDONE	SLCO3A1	rs3924426
ILOPERIDONE	CELF4	rs4799915
ILOPERIDONE	NRG3	rs4933824
ILOPERIDONE	PALLD	rs17054392
KETAMINE	SEC11A	rs55945116
KETAMINE	RPSAP44 - KRASP1	rs112647602
KETAMINE	AC093831.1 - AC025554.1	rs1846786
KETAMINE	OSBP2	rs5997786
KETAMINE	MRPL50P1 - AC009414.1	rs1524145
KETAMINE	MAB21L3 - LINC01779	rs6689906
KETAMINE	AL357137.1 - LINC01649	rs79749176
KETAMINE	RASGRF2	rs17211233
KETAMINE	ROBO2	rs1400237
KETAMINE	AL441989.1 - MIR147A	rs12236015
KETAMINE	ROBO2	rs9713737
KETAMINE	AC007389.1	rs77987715
KETAMINE	AC093909.4 - AC122138.1	rs3900502
KETAMINE	AP000943.3	rs3018154
KETAMINE	SHLD1	rs1287071
KETAMINE	TOGARAM2	rs11127199
KETAMINE	ROBO2	rs4855976
KETAMINE	GDAP1L1 - FITM2	rs11907319
KETAMINE	LINC00923	rs4558394
OLANZAPINE	ADGRV1	rs1967256
OLANZAPINE	ZFPM2	rs977396
OLANZAPINE	AC009117.2	rs4783227
OLANZAPINE	IGSF8 - ATP1A2	rs6688363
OLANZAPINE	SPOPL	rs10170310
OLANZAPINE	HIVEP1 - EDN1	rs1040994
OLANZAPINE	CRCT1 - LCE3E	rs10888501
OLANZAPINE	RF00019 - AC026320.2	rs7635839
OLANZAPINE	ANKS1B	rs7968606
OLANZAPINE	RF01848 - LINC01985	rs9862857
OLANZAPINE	NRG1	rs17673138
OLANZAPINE	LINGO2 - MIR876	rs10968749
OLANZAPINE	ZNF93	rs10405744
OLANZAPINE	CACNA1C	rs2239063
OLANZAPINE	CIB4	rs1731240
PALIPERIDONE	LINC01505	rs4335177
PALIPERIDONE	PLD1	rs149053538
PALIPERIDONE	CHCHD6	rs74405815
PALIPERIDONE	RBFOX1 - RF00561	rs9930542
PALIPERIDONE	RNF135	rs79533578
PALIPERIDONE	POMT2	rs142996120
PALIPERIDONE	MYL6P5 - AC005144.1	rs2429928
PALIPERIDONE	CTNNA3	rs200868329
PALIPERIDONE		chr12:106657179
PALIPERIDONE	PIM3	rs117325373
PALIPERIDONE	EGFEM1P	rs115449435
PALIPERIDONE	USP24	rs113353280
PALIPERIDONE	ACTN4P1 - RNU6-119P	rs76540759
PALIPERIDONE	EGFEM1P	rs76289741
PALIPERIDONE	AL117329.1	rs147466853
PALIPERIDONE	CTSC - GAPDHP70	rs1451608
PALIPERIDONE	TUSC3 - PPM1AP1	rs145847018
PALIPERIDONE	AC104042.1 - RF00322	rs75528631
PALIPERIDONE	STEAP2-AS1	rs147692810
PALIPERIDONE	RBFOX1 - RF00561	rs5020196
PALIPERIDONE	SPTLC2 - COX6CP11	rs12434701
PALIPERIDONE	AP000769.3 - MALAT1	rs4102217
PALIPERIDONE	AC069439.1 - PPIAP74	rs73878431
PALIPERIDONE	AC005165.1 - AC010719.1	rs57425123
PALIPERIDONE	AC060809.1, AC104041.1	rs3934047
PALIPERIDONE	AC092957.1	rs6440475
PALIPERIDONE	ZBBX	rs6777098
PALIPERIDONE	CSMD1	rs11984453
PALIPERIDONE	OXR1	rs73309282
PALIPERIDONE	EIF3F, EIF3F	rs10769859
PALIPERIDONE		chr8:102010440
PALIPERIDONE	CWH43	rs77730715
PALIPERIDONE		chr3:24752415
PALIPERIDONE	AC007179.2, AC007100.1	rs6545747
PALIPERIDONE	PAEPP1 - AL354761.1	rs7859245
PALIPERIDONE	NRP1	rs10827221
PALIPERIDONE	DKK3 - LINC02547	rs923806
PALIPERIDONE	MIR100HG	rs117752187
PALIPERIDONE	TUSC3	rs76830538
PALIPERIDONE	TUSC3 - PPM1AP1	rs117019455
PALIPERIDONE	AC027306.1, KCNIP1	rs75070487
PALIPERIDONE	LINC00964 - ZNF572	rs2382999
PALIPERIDONE	RBFOX1	rs188803409
PALIPERIDONE	AP001970.1 - RF00096	rs79862545
PALIPERIDONE	XKR6	rs149776388
PALIPERIDONE	CACNA1B	rs7036881
PALIPERIDONE	LINC00284, AL512506.3	rs73177327
PALIPERIDONE	OSCP1	rs138707712
PALIPERIDONE	SH3GL2 - ADAMTSL1	rs141473550
PALIPERIDONE	PAEPP1 - AL354761.1	rs12001041
PALIPERIDONE	AC099654.4 - AC237221.2	rs180968789
PALIPERIDONE	IQGAP2	rs150202118
PALIPERIDONE	NSMCE2	rs201447509
PALIPERIDONE	RF00017 - AC110588.1	rs2083117
PALIPERIDONE	RN7SKP279 - AP003532.1	rs147237795
PALIPERIDONE	SGCZ	rs116939006
PALIPERIDONE	AFF3	rs28425639
PALIPERIDONE	CACNA1B	rs78178087
PALIPERIDONE	AC091114.1	rs78309295
PALIPERIDONE	PTPRT	rs79886049
PALIPERIDONE	AC034268.2	rs79851935
PALIPERIDONE	LINC02098 - ETS1	rs117858172
PALIPERIDONE	DPP10	rs7419486
PALIPERIDONE	SGCZ	rs146790986
PALIPERIDONE		chr2:71975709
PALIPERIDONE	ZWINT - RF01299	rs143325061
PALIPERIDONE	FAP	rs76799118
PALIPERIDONE	AC018767.3	rs146767487
PALIPERIDONE	FSTL5 - MTHFD2P4	rs182734081
PALIPERIDONE	AC011369.1, TENM2	rs74757231
PALIPERIDONE	ENOX1	rs189688109
PALIPERIDONE	RPL21P119 - LINC02177	rs77561866
PALIPERIDONE	AC245054.1 - RSPH14	rs150863502
PALIPERIDONE	LINC00709 - HSP90AB7P	rs117612853
PALIPERIDONE	DDX43P2 - AC093775.1	rs117295891
PALIPERIDONE	CR1L	rs4562622
PALIPERIDONE	LINC02223	rs11956350
PALIPERIDONE	HIBCH	rs59000197
PALIPERIDONE	AL590426.2 - AL365222.1	rs56031646
PALIPERIDONE	HMCN1 - PRG4	rs182020790
PALIPERIDONE	FSTL5	rs116557595
PALIPERIDONE	AZIN1-AS1	rs188710179
PALIPERIDONE	VPS45	rs7554419
PALIPERIDONE	AC007381.1	rs139132350
PALIPERIDONE	ZNF362	rs45496701
PALIPERIDONE	PECR	rs1647768
PALIPERIDONE	ADCK1	rs34272020
PALIPERIDONE	AMBP	rs2567700
PALIPERIDONE	AMBP	rs12344124
PALIPERIDONE	ARHGEF28	rs73105738
PALIPERIDONE	AL445264.1 - MTCL1P1	rs77584330
PALIPERIDONE	AC069439.1 - PPIAP74	rs6443921
PALIPERIDONE	WDR82P2 - AL714022.1	rs115212412
PALIPERIDONE	CSMD3 - AC103993.1	rs145712811
PALIPERIDONE	CWH43	rs55774002
PALIPERIDONE	AL117329.1	rs151233144
PALIPERIDONE	IGLC7 - AC245054.2	rs144212837
PALIPERIDONE	AC008892.1	rs192381152
PALIPERIDONE	TUSC3 - PPM1AP1	rs201581573
PALIPERIDONE	CA12	rs67357741
PALIPERIDONE	NXN, NXN, NXN	rs200136777
PALIPERIDONE		chr2:230347877
PALIPERIDONE		chr16:8606507
PALIPERIDONE	MYL6P5 - AC005144.1	rs2429929
PALIPERIDONE	KIAA1549 - ZC3HAV1L	rs77301145
PALIPERIDONE	LINC00284 - LINC00390	rs181534711
PALIPERIDONE	AC006504.7 - AC010511.1	rs147515995
PALIPERIDONE	LNX1-AS1, AC058822.1, LNX1	rs115342620
PALIPERIDONE	LINC01899 - AC027458.1	rs8094969
PALIPERIDONE	POLN	rs1923775
PALIPERIDONE	GVQW3	rs4945082
PALIPERIDONE	PRLR	rs74370740
PALIPERIDONE	SLC17A6	rs1447514
PALIPERIDONE	LINC01644 - LINC00898	rs76989557
PALIPERIDONE	TOX	rs73249047
PALIPERIDONE	NPM1P28 - AC092925.1	rs111916630
PALIPERIDONE	ZNF611	rs28785552
PALIPERIDONE	LINC00499	rs80052780
PALIPERIDONE	C3orf38	rs9815738
PALIPERIDONE	OR10D1P - OR10D3	rs118106993
PALIPERIDONE	SERPINA1, SERPINA1	rs72706301
PALIPERIDONE	AC096559.1 - AC009486.1	rs56175057
PALIPERIDONE	PHF20	rs7267005
PALIPERIDONE	ENOX1	rs145463728
PALIPERIDONE	LINC01220 - AF111167.2	rs12323387
PALIPERIDONE	PTPN6	rs7963446
PALIPERIDONE	EFNA5	rs464250
PALIPERIDONE	DMAC1	rs10758913
PALIPERIDONE	AC012254.2, HDHD2	rs76297747
PALIPERIDONE	PLCB1	rs6055808
PALIPERIDONE	COL26A1	rs145252195
PALIPERIDONE	IQGAP2	rs55728704
PALIPERIDONE	DLGAP2	rs80058639
PALIPERIDONE	SMC5 - KLF9	rs202106186
PALIPERIDONE	AC114689.3	rs6566288
PALIPERIDONE	AC027458.1	rs2685441
PALIPERIDONE	ANO4	rs644939
PALIPERIDONE	CELF2-DT - AL136452.1	rs11256768
PALIPERIDONE	RUNX2 - CLIC5	rs17288586
PALIPERIDONE	ADCK1	rs56374507
PALIPERIDONE	AC026167.1	rs116144992
PALIPERIDONE	VIPAS39	rs11624682
PALIPERIDONE	RN7SL776P - PHBP14	rs7675231
PALIPERIDONE	LINC01899 - AC027458.1	rs8094969
PALIPERIDONE	ZFAND6	rs201061212
PALIPERIDONE	AC058822.1, LNX1-AS1, LNX1	rs183993610
PALIPERIDONE	AC093752.1, PDE5A	rs2127826
PALIPERIDONE	SGCD	rs111751755
PALIPERIDONE	SGCD	rs17555185
PALIPERIDONE		chr3:67336707
PALIPERIDONE	SLC47A2	rs9900497
PALIPERIDONE		chr4:7352632
PALIPERIDONE	RASGRF2	rs190585232
PALIPERIDONE	EVL	rs34804741
PALIPERIDONE	ANO4	rs502697
PALIPERIDONE	PRMT8	rs61909487
PALIPERIDONE	PTPN13	rs113925979
PALIPERIDONE	AP001999.1 - AP003062.1	rs10894895
PALIPERIDONE	AC062015.1 - MIR5702	rs76008570
PALIPERIDONE	TCERG1L	rs2944499
PALIPERIDONE	CACNA1S	rs3767510
PALIPERIDONE	LINC01220 - AF111167.2	rs8008002
PALIPERIDONE	AC060809.1, AC104041.1	rs28403489
PERPHENAZINE	AL157944.1	rs11163585
PERPHENAZINE	AC093157.1	rs17410015
PERPHENAZINE	PXDN - MYT1L	rs6735179
PERPHENAZINE	RNF144A	rs6741819
PERPHENAZINE	AC007100.1 - AC007381.1	rs10202231
PERPHENAZINE	C4orf54 - DAPP1	rs11735070
PERPHENAZINE	ASTN2	rs4838255
PERPHENAZINE	SOX5, SOX5-AS1	rs1464500
PERPHENAZINE	CLMN	rs1187614
PERPHENAZINE	SHISA9	rs153091
PERPHENAZINE	FHOD3	rs17651157
PERPHENAZINE	AC074389.2 - ELFN1	rs13239071
PERPHENAZINE	DKK3	rs7116879
PERPHENAZINE	FRA10AC1 - LGI1	rs75953396
PERPHENAZINE	AC093297.2 - AC114954.1	rs77989818
PERPHENAZINE	AP003497.1 - AP003497.2	rs7358476
QUETIAPINE	SLC22A23	rs4959235
QUETIAPINE	PDE4D	rs17382202
QUETIAPINE	FGF9 - RN7SL766P	rs518590
QUETIAPINE	IGF1 - AC010202.1	rs150634721
QUETIAPINE	SYF2P2 - AL353795.3	rs2802383
QUETIAPINE	ATP6V1G1P7 - RPL7P45	rs9554958
QUETIAPINE	GALNT10	rs76694263
QUETIAPINE	AL390957.1	rs16834649
QUETIAPINE	RN7SL338P - VCP	rs642296
QUETIAPINE	LINC02674 - AL513324.1	rs7088969
QUETIAPINE	AL390957.1	rs34624213
QUETIAPINE	LINC01310	rs28533249
QUETIAPINE	AL390957.1	rs3753947
QUETIAPINE	AC109492.1 - LINC01949	rs30419
QUETIAPINE	DNAJB5	rs4879848
QUETIAPINE	SPOCK1	rs986359
QUETIAPINE	PIGO	rs568300
QUETIAPINE	STOML2 - FAM214B	rs630961
RISPERIDONE	GRM7	rs2133450
RISPERIDONE	AL354872.2 - AL354872.1	rs10458561
RISPERIDONE	TSPYL5 - SNORD3H	rs6468544
RISPERIDONE	AC025281.1 - RNA5SP428	rs8050896
RISPERIDONE	TNFRSF11A - RPL17P44	rs2980976
RISPERIDONE	PPA2	rs2636697
RISPERIDONE	TJP1, TJP1	rs711355
RISPERIDONE	AL589923.1 - AL162391.1	rs888219
RISPERIDONE	CNTNAP5	rs17727261
RISPERIDONE	TRPM1, TRPM1, AC009562.1	rs17815774
RISPERIDONE	HCG20, HCG20, HCG20, HCG20, HCG20	rs12526186
RISPERIDONE	AC009411.2, AC018742.1	rs1117324
RISPERIDONE	AC008696.2	rs17100498
RISPERIDONE	AP003063.1	rs7105881
RISPERIDONE	MEIS2	rs1568679
RISPERIDONE	ATF7IP2	rs13335336
RISPERIDONE	RPS2P6 - AC091305.1	rs8092443
RISPERIDONE	RPS2P6 - AC091305.1	rs11663206
RISPERIDONE	RPL12P4 - LINC01440	rs6092078
RISPERIDONE	SLC1A1	rs16921385
ZIPRASIDONE	AP006295.1 - RNU6-544P	rs7395555
ZIPRASIDONE	AC093913.1 - RF01210	rs17390445
ZIPRASIDONE	EMCN - PPP3CA	rs1405687
ZIPRASIDONE	Z85994.2 - LINC01656	rs737724
ZIPRASIDONE	LINC00303 - SOX13	rs12567918
ZIPRASIDONE	AC106868.1 - PCDH7	rs10012947
ZIPRASIDONE	LINC00303	rs12133007
ZIPRASIDONE	AC116337.3	rs4320241
ZIPRASIDONE	AC025539.1 - AC005699.1	rs183547317
ZIPRASIDONE	ZP1	rs3862662
ZIPRASIDONE	AC093766.1	rs59730210
ZIPRASIDONE	LINC00303 - SOX13	rs56080959
LURASIDONE	DYNC2H1, AP002989.1	rs10895475
LURASIDONE	STXBP5L, LINC02049	rs511841
LURASIDONE	STXBP5L	rs7620938
LURASIDONE	RN7SKP123, RNU6-210P	rs524045
LURASIDONE	TENM4	rs642516
LURASIDONE	EYS	rs4507566
LURASIDONE	RNA5SP166, AC108935.1	rs60354593
LURASIDONE	RF00012, PRLR	rs26193
LURASIDONE	LINC00460, RPL35P9	rs12857574
ESCITALOPRAM	PLPPR4 - AL365220.1	rs111365677
ESCITALOPRAM	SPSB4	rs142484554
ESCITALOPRAM	ATP5MD	rs188843168
ESCITALOPRAM	AC022201.1	rs6546604
ESCITALOPRAM	APBB2	rs34177316
ESCITALOPRAM	AP002765.1 - ZNF202	rs201921722
ESCITALOPRAM	TFAP2D	rs80278479
ESCITALOPRAM	CSE1L	rs6063349
ESCITALOPRAM	CSTF3	rs142641502
ESCITALOPRAM	FOXF2 - RN7SL352P	rs201569130
ESCITALOPRAM	DRAIC - TLE3	rs1548076
ESCITALOPRAM	CORO1B - GPR152	rs182377406
ESCITALOPRAM	ARL6IP1P3 - AP002759.1	rs74860738
ESCITALOPRAM	AL135936.1 - SLC24A3	rs143934587
ESCITALOPRAM	LINC01618	rs189864513
ESCITALOPRAM	DGKG	rs11924809
ESCITALOPRAM	NT5C2	rs117375960
BUPROPION	SACM1L	rs2742417
BUPROPION	PGAM1P5	rs7136572
BUPROPION	WDFY4	rs10857636
BUPROPION	AC006043.1, MAGI2	rs17150687
BUPROPION	AC097535.1 - AC016687.3	rs10517287
BUPROPION	AGBL1	rs17647114
BUPROPION	GPRIN3 - AC097478.1	rs1908557
BUPROPION	BAZ1A	rs77945277
BUPROPION	AL358215.3	rs4839421
BUPROPION	AC090458.1 - AC109810.1	rs75995702
BUPROPION	AC007718.1 - AC091193.1	rs34102224
BUPROPION	BHLHE41, SSPN	rs200855945
BUPROPION	AC107222.1 - ENPP6	rs112538845
BUPROPION	CUL3 - CCDC195	rs78087832
BUPROPION	TNC, DEC1	rs112106319
BUPROPION	NAV3	rs73425402
BUPROPION	FYB1	rs201203751
BUPROPION	NLK	rs183124483
BUPROPION	HCN1 - AC122694.1	rs56388524
BUPROPION	ADAMTS6	rs143405544
BUPROPION	ZHX3	rs183042538
CITALOPRAM	AC097535.1 - AC016687.3	rs10517287
CITALOPRAM	AGBL1	rs17647114
CITALOPRAM	LINC00276	rs16861531
CITALOPRAM	AC066595.1 - CHL1-AS2	rs6795349
CITALOPRAM	RF00026 - HSP90AB2P	rs491376
CITALOPRAM	RF00026 - HSP90AB2P	rs573332
CITALOPRAM	ZDHHC14	rs2163287
CITALOPRAM	AC105031.1 - AC090095.1	rs7015622
CITALOPRAM	AL391056.1 - NTMT1	rs10988449
CITALOPRAM	DTWD1	rs8039808
CITALOPRAM	AC018767.2	rs2034588
CITALOPRAM	LGALS2 - GGA1	rs12157904
CITALOPRAM	FOXD2 - AL356458.1	rs527430
CITALOPRAM	CASC8 - AC104370.1	rs17766217
CITALOPRAM	PLPPR4 - AL365220.1	rs111365677
CITALOPRAM	SPSB4	rs142484554
CITALOPRAM	ATP5MD	rs188843168
CITALOPRAM	AC022201.1	rs6546604
CITALOPRAM	APBB2	rs34177316
CITALOPRAM	AP002765.1 - ZNF202	rs201921722
CITALOPRAM	TFAP2D	rs80278479
CITALOPRAM	CSE1L	rs6063349
CITALOPRAM	CSTF3	rs142641502
CITALOPRAM	FOXF2 - RN7SL352P	rs201569130
CITALOPRAM	DRAIC - TLE3	rs1548076
CITALOPRAM	CORO1B - GPR152	rs182377406
CITALOPRAM	ARL6IP1P3 - AP002759.1	rs74860738
CITALOPRAM	AL135936.1 - SLC24A3	rs143934587
CITALOPRAM	LINC01618	rs189864513
CITALOPRAM	DGKG	rs11924809
CITALOPRAM	NT5C2	rs117375960
DULOXETINE	AC026202.1 - AC087857.1	rs4685959
DULOXETINE	LCORL - AC093898.1	rs13147572
SERTRALINE	AC007422.2 - LINC01812	rs13432159
SERTRALINE	AC007422.2 - LINC01812	rs6724422
VENLAFAXINE	LINC02103 - RNU6-909P	rs11949289
VENLAFAXINE	POLG	rs2307441
VENLAFAXINE	DYSF - RPS20P10	rs6712232
VENLAFAXINE	AGAP1	rs75965524
VENLAFAXINE	AL356277.3 - AL356473.1	rs6918679
VENLAFAXINE	RPSAP53 - LINC00364	rs3013580
VENLAFAXINE	AL646090.2 - LINC02549	rs76778048
VENLAFAXINE	AP000251.1 - FBXW11P1	rs2070419
VENLAFAXINE	PCP4	rs3819595
VENLAFAXINE	MCPH1, MCPH1-AS1	rs3020264
VENLAFAXINE	CSMD2	rs10914746
VENLAFAXINE	AL161616.2	rs7984972
VENLAFAXINE	ANGEL1	rs7152947
VENLAFAXINE	LRRC74A	rs8020289
VENLAFAXINE	RNU1-138P - CAMK2D	rs13129231
VENLAFAXINE	AC067751.1, ADO	rs2236295
VENLAFAXINE	ZRANB2-AS2, NEGR1	rs977145
VENLAFAXINE	RN7SKP114 - AL354989.1	rs7853333
OXCARBAZEPINE	LINC01808	rs1718641
OXCARBAZEPINE	AC091493.1 - PLCL2	rs9833158
OXCARBAZEPINE	AC008568.2 - RPL23AP44	rs4895178
OXCARBAZEPINE	AC008892.1	rs148646711
OXCARBAZEPINE	OLFML3	rs1394074
OXCARBAZEPINE	AC022509.2, AC024145.1	rs7300380
OXCARBAZEPINE	TEAD3	rs72894781
Additional Table 2. Antipsychiatric drug-SNP correlations, which have been reported once (duplicates removed) in the assessed 20 studies deposited in the GWAS catalog. The drug compound, the rs identified and the gene name are also provided.
